# Supplementary material for: Conformational studies of ligand-template assemblies and the consequences for encapsulation of rhodium complexes and hydroformylation catalysis
Source: Royal Society of Chemistry journal article supplement (doi:10.1039/c3cy20665c), 2013-01-01
Supplement: c3cy20665c.pdf [file c3cy20665c.pdf]

## Supporting info

# **Conformational Studies of Template-Assisted Self-Assembled Molecular Capsules and the Use of their Rhodium Complexes in Hydroformylation reactions†**

**Ivo Jacobs,<sup>a</sup> Adri C. T. van Duin,<sup>b</sup> Arjan W. Kleij,<sup>a,d</sup> Mark Kuil,<sup>a</sup> Duncan M. Tooke,<sup>c</sup> Anthony L. Spek<sup>c</sup> and Joost N. H. Reek<sup>\*a</sup>**

## Detailed Results of Hydroformylation Catalysis

Table S1. A summary of the results of octene hydroformylation using supramolecular rhodium catalysts based on the tris-*m*-pyridylphosphine template.

| Entry | Substrate <sup>1</sup> | Building block <sup>2</sup> | Substrate: catalyst ratio | Reaction time | out/in | Yield | TOF | Ref. |
|-------|------------------------|-----------------------------|---------------------------|---------------|--------|-------|-----|------|
| 1     | 1                      | -                           | 1052                      | 65            | 2.30   | 31    | 5   | 1    |
| 2     | 1                      | 2f                          | 1052                      | 65            | 1.40   | 97    | 16  | 1    |
| 3     | 1                      | 2c                          | 1052                      | 65            | 1.00   | 97    | 16  | 1    |
| 4     | 1                      | 2b                          | 1052                      | 65            | 1.20   | 97    | 16  | 1    |
| 5     | 1                      | 2d                          | 1052                      | 65            | 0.80   | 97    | 16  | 1    |
| 6     | 1                      | -                           | 1052                      | 24            | 2.88   | 6     | 3   | 2    |
| 7     | 1                      | 2a                          | 1052                      | 24            | 0.56   | 52    | 23  | 2    |
| 8     | 2                      | -                           | 1052                      | 73            | 1.27   | 17    | 2   | 2    |
| 9     | 2                      | 2a                          | 1052                      | 73            | 0.11   | 32    | 5   | 2    |
| 10    | 2                      | 2c                          | 1052                      | 73            | 1.04   | 47    | 7   | 3    |
| 11    | 2                      | 2d                          | 1052                      | 73            | 0.86   | 48    | 7   | 3    |
| 12    | 3                      | -                           | 1052                      | 73            | 0.98   | 26    | 4   | 2    |
| 13    | 3                      | 2a                          | 1052                      | 73            | 0.31   | 45    | 6   | 2    |
| 14    | 3                      | 2c                          | 1052                      | 73            | 1.03   | 60    | 9   | 3    |
| 15    | 3                      | 2d                          | 1052                      | 73            | 0.98   | 63    | 9   | 3    |
| 16    | 1                      | -                           | 5160                      | 18            | 2.80   | 4     | 11  | 4    |
| 17    | 1                      | 2a                          | 5160                      | 18            | 0.60   | 44    | 126 | 4    |
| 18    | 1                      | -                           | 1000                      | 16            | 2.50   | 27    | 16  | 5    |
| 19    | 1                      | 2b                          | 1000                      | 16            | 1.60   | 59    | 38  | 5    |
| 20    | 1                      | 2c                          | 1000                      | 16            | 1.30   | 42    | 27  | 5    |
| 21    | 1                      | 2e                          | 1000                      | 16            | 1.90   | 22    | 13  | 5    |
| 22    | 1                      | 2f                          | 1000                      | 16            | 1.80   | 21    | 12  | 5    |

## References

- 1 AW Kleij, M Lutz, AL Spek, PWNM van Leeuwen, JNH Reek, Chem Commun, 2005 (29) pp. 3661-3663.
- 2 M Kuil, T Soltner, PWNM van Leeuwen, JNH Reek, J Am Chem Soc, 2006 vol. 128 (35) pp. 11344-11345.
- 3 M Kuil, PhD Thesis, University of Amsterdam.
- 4 VF Slagt, JNH Reek, PCJ Kamer, PWNM van Leeuwen, Angew. Chem. Int. Edit., 2001 vol. 40 (22) pp. 4271-4274.
- 5 This paper.

<sup>1</sup> 1: 1-octene, 2: 2-octene, 3: 3-octene.

<sup>2</sup> See Scheme 1 in the main article.

## Raw NMR data

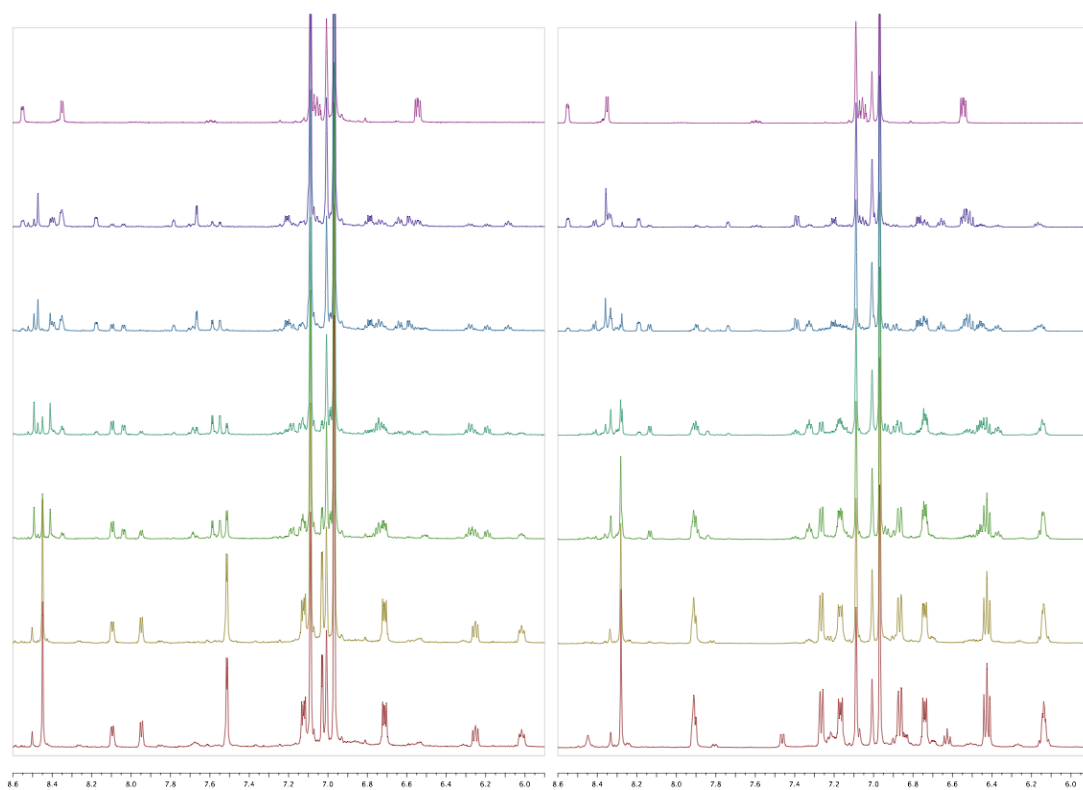

Figure S1. Aromatic regions of the spectra in Fig. 7

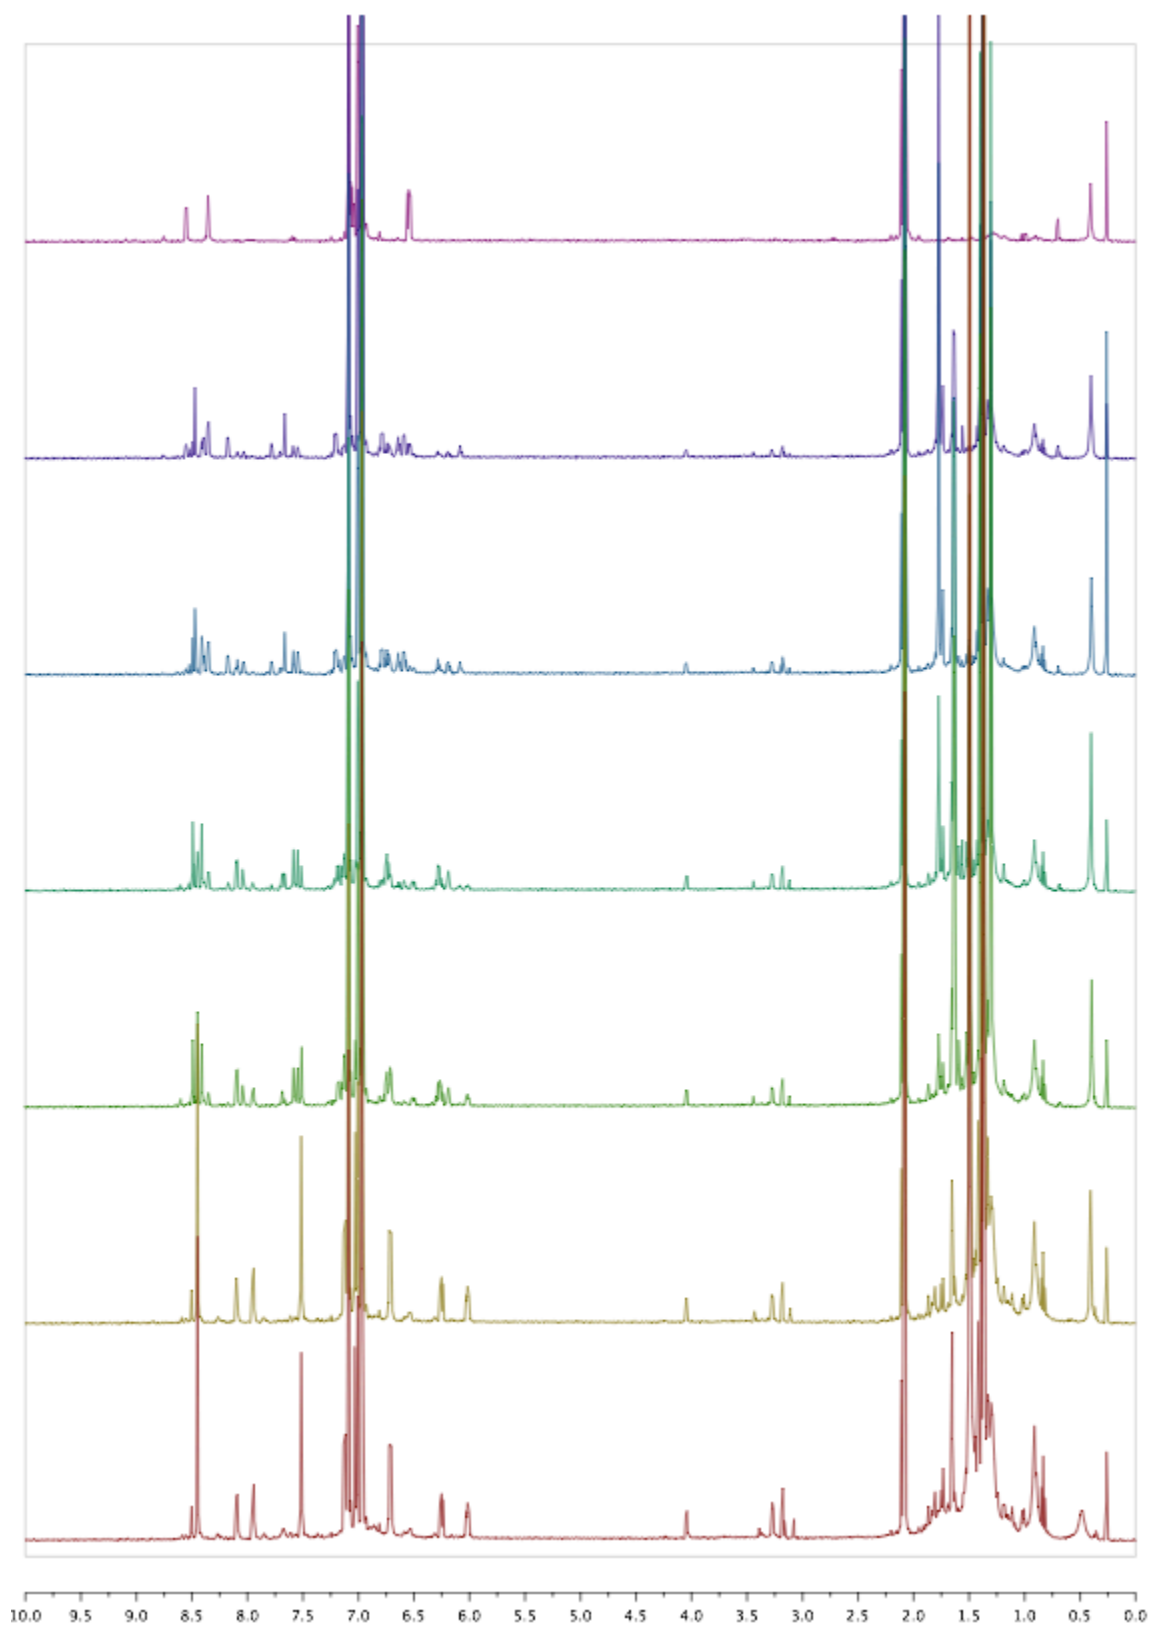

Figure S2. Full spectra of the NMR titration of **1** with **2j** in figure 7

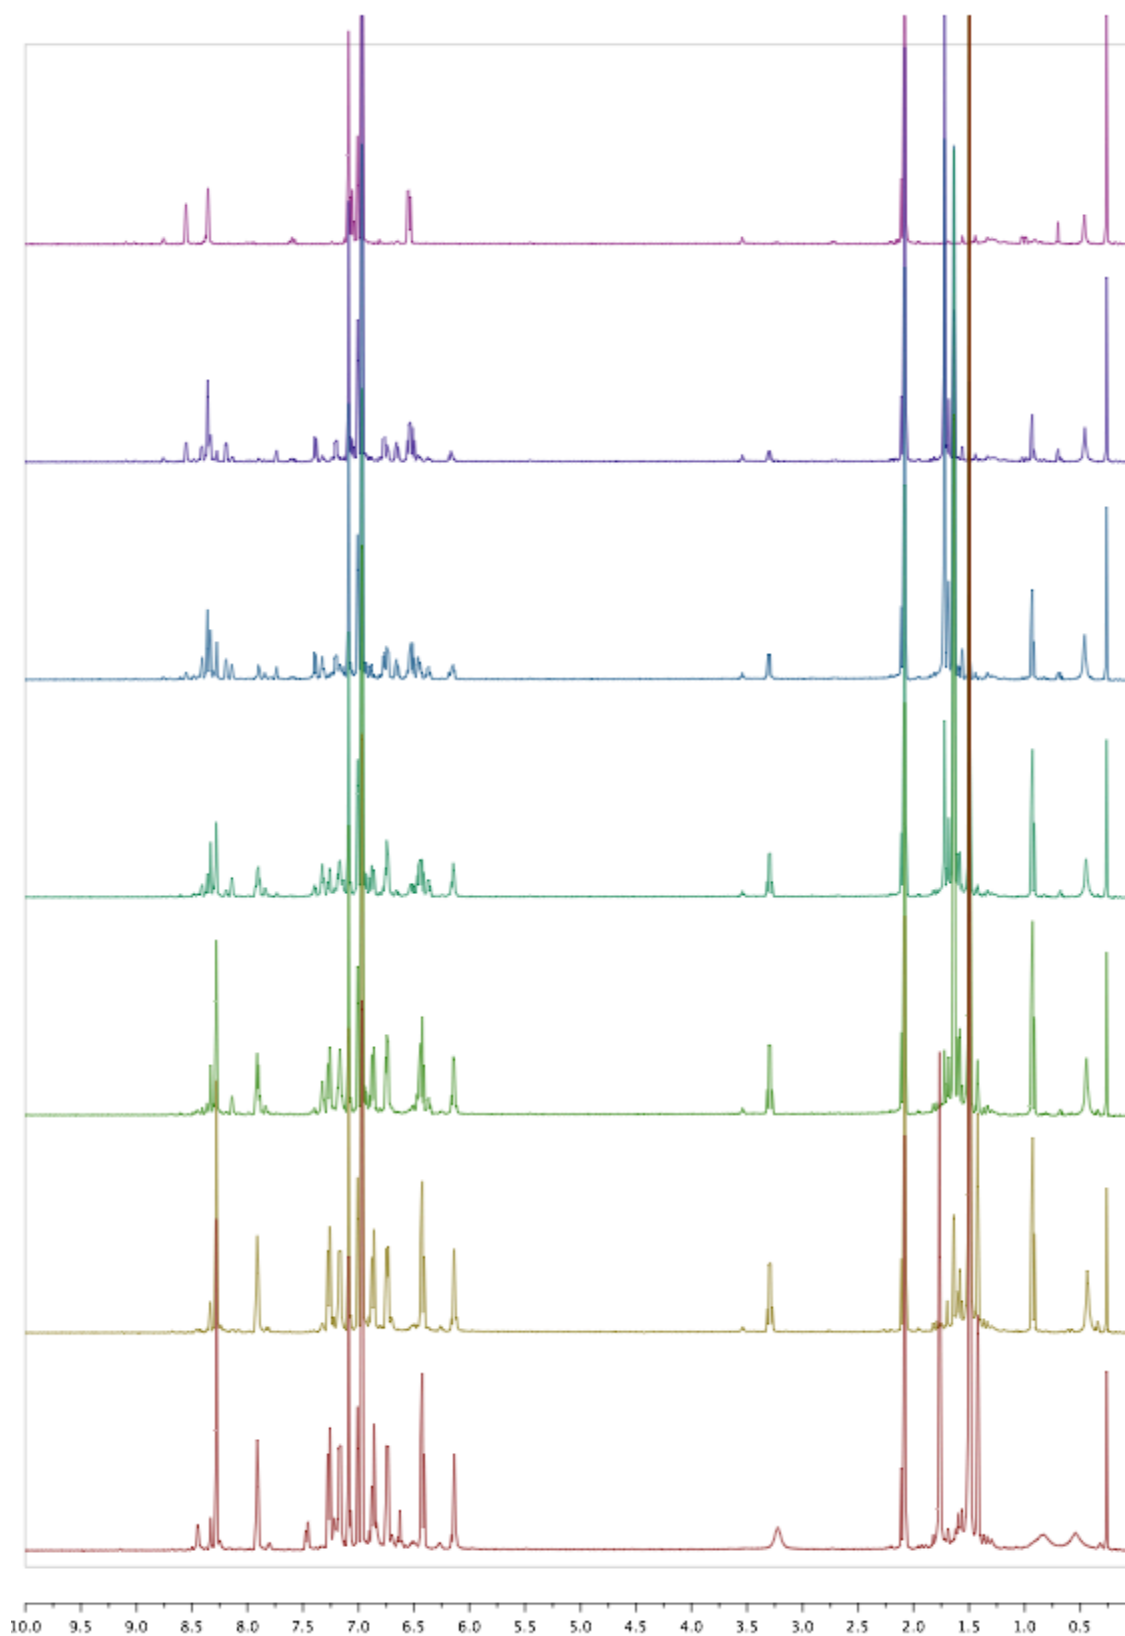

Figure S3. Full spectra of the NMR titration of **1** with **2i** in figure 7

## Results of DFT calculations used for Ru- and Zn-parametrization

DFT calculations were performed with Jaguar<sup>3</sup> using the B3LYP functional and the 6-31G\*\*++ basis set.

*Pyridine:*

11

|     |               |               |              |
|-----|---------------|---------------|--------------|
| N13 | 1.3932312687  | 0.0105087118  | 0.0000000000 |
| C14 | 0.6861595955  | 1.1495270907  | 0.0000000000 |
| C15 | -0.7103469593 | 1.1941248964  | 0.0000000000 |
| C16 | -1.4147239507 | -0.0109316183 | 0.0000000000 |
| C17 | -0.6924766870 | -1.2048734699 | 0.0000000000 |
| C18 | 0.7036495111  | -1.1386093907 | 0.0000000000 |
| H19 | 1.2661341870  | 2.0700946284  | 0.0000000000 |
| H20 | -1.2271455990 | 2.1488665324  | 0.0000000000 |
| H21 | -2.5009957992 | -0.0182948298 | 0.0000000000 |
| H22 | -1.1934222425 | -2.1680063101 | 0.0000000000 |
| H23 | 1.2972238117  | -2.0505245992 | 0.0000000000 |

energy: -248.30339650304 hartrees

*Ru(II)Salen-CO:*

23

|     |               |               |               |
|-----|---------------|---------------|---------------|
| Ru1 | -0.0500382455 | 0.1638954460  | 0.0875980600  |
| O1  | -0.1760349604 | -0.0741442648 | 2.1704778235  |
| C2  | 0.8698524838  | -0.1195987989 | 2.9020075584  |
| C3  | 2.2219928672  | -0.1279101689 | 2.5134654804  |
| C4  | 2.7256419122  | -0.1326920759 | 1.2045316114  |
| N5  | 1.9867186014  | -0.0554638595 | 0.1030229912  |
| C6  | 2.5200297882  | -0.1069829223 | -1.1831576418 |
| C7  | 1.6450636099  | -0.1062531313 | -2.2248501053 |
| N8  | 0.2862229051  | -0.0541411903 | -1.9215865065 |
| C9  | -0.6711272862 | -0.1315354341 | -2.8395141240 |
| C10 | -2.0472555488 | -0.1274708603 | -2.5692704645 |
| C11 | -2.6633706598 | -0.1196653212 | -1.3044834585 |
| O12 | -2.1235702437 | -0.0736398874 | -0.1479587168 |
| H24 | 0.6730792053  | -0.1806091508 | 3.9801653035  |
| H25 | 2.9485547802  | -0.1849618837 | 3.3171204868  |
| H26 | 3.8069538375  | -0.2297397018 | 1.0738449111  |
| H27 | 3.5976726138  | -0.1510654854 | -1.3156545747 |
| H28 | 1.9616657163  | -0.1496629488 | -3.2634651289 |
| H29 | -0.3557767032 | -0.2273231025 | -3.8821500593 |
| H30 | -2.7135899374 | -0.1845389864 | -3.4235255784 |
| H31 | -3.7592985573 | -0.1818490343 | -1.2968746687 |

<sup>3</sup> Jaguar, version 7.0, Schrodinger, LLC, New York, NY, 2007.

|     |               |              |              |
|-----|---------------|--------------|--------------|
| C32 | -0.0287185904 | 1.9743924188 | 0.0704335630 |
| O33 | -0.0094580043 | 3.1377616798 | 0.0546231807 |

energy: -776.92927488154 hartrees

*Ru(II)Salen-CO-Pyridine:*

34

|     |               |               |               |
|-----|---------------|---------------|---------------|
| Ru1 | -0.0231188138 | 0.0876492671  | 0.0603906404  |
| O1  | -0.1236775819 | -0.1448427033 | 2.1749449313  |
| C2  | 0.9481483319  | -0.1572672672 | 2.8678756385  |
| C3  | 2.2898264759  | -0.0674509318 | 2.4532181730  |
| C4  | 2.7834642481  | 0.0523109276  | 1.1402585737  |
| N5  | 2.0368384906  | 0.1175374854  | 0.0510002610  |
| C6  | 2.5491997426  | 0.2272988747  | -1.2383621870 |
| C7  | 1.6636306989  | 0.2375710000  | -2.2751674043 |
| N8  | 0.3088191649  | 0.1378908548  | -1.9718490551 |
| C9  | -0.6510310810 | 0.0909321570  | -2.8803482771 |
| C10 | -2.0262051851 | -0.0193800310 | -2.5991685018 |
| C11 | -2.6461174158 | -0.1172855274 | -1.3398065147 |
| O12 | -2.1289245795 | -0.1211993648 | -0.1730663704 |
| N13 | -0.0044410927 | -2.1402851162 | 0.0232633748  |
| C14 | -0.9102377644 | -2.7742802314 | 0.7922068619  |
| C15 | -0.9896055081 | -4.1643634813 | 0.8583940162  |
| C16 | -0.1008945820 | -4.9300597233 | 0.1029335138  |
| C17 | 0.8373262131  | -4.2722597519 | -0.6941313664 |
| C18 | 0.8521417946  | -2.8789111987 | -0.7055721244 |
| H19 | -1.5765375787 | -2.1333303443 | 1.3585898064  |
| H20 | -1.7370715268 | -4.6289715383 | 1.4929948064  |
| H21 | -0.1380980807 | -6.0151387835 | 0.1340374655  |
| H22 | 1.5494735460  | -4.8231283998 | -1.2997712222 |
| H23 | 1.5634762899  | -2.3269233385 | -1.3103912099 |
| H24 | 0.7917479024  | -0.2601727752 | 3.9509989242  |
| H25 | 3.0294816281  | -0.1041319718 | 3.2465264338  |
| H26 | 3.8691955540  | 0.0883205517  | 1.0081892635  |
| H27 | 3.6242541142  | 0.3007504256  | -1.3844064509 |
| H28 | 1.9765624107  | 0.3194834791  | -3.3134436969 |
| H29 | -0.3503140953 | 0.1353434782  | -3.9317656765 |
| H30 | -2.6942147444 | -0.0413300429 | -3.4542343454 |
| H31 | -3.7412244686 | -0.2107015160 | -1.3555961497 |
| C32 | -0.1330592876 | 1.9557144391  | 0.1754676105  |
| O33 | -0.2090428902 | 3.1097289792  | 0.2542945733  |

energy: -1025.25992590245 hartrees

*Zn(II)Salen:*

21

|     |               |               |              |
|-----|---------------|---------------|--------------|
| Zn1 | -0.3300311178 | 0.2751305970  | 0.0000000000 |
| O1  | -0.3514036433 | 2.2593814459  | 0.0000000000 |
| C2  | 0.6741227692  | 3.0289444490  | 0.0000000000 |
| C3  | 2.0260858372  | 2.6688755872  | 0.0000000000 |
| C4  | 2.5154530464  | 1.3497655263  | 0.0000000000 |
| N5  | 1.7486934519  | 0.2729922676  | 0.0000000000 |
| C6  | 2.2635741869  | -1.0106073289 | 0.0000000000 |
| C7  | 1.3879351027  | -2.0537194992 | 0.0000000000 |
| N8  | 0.0343971802  | -1.7684865102 | 0.0000000000 |
| C9  | -0.8942865096 | -2.7093086342 | 0.0000000000 |
| C10 | -2.2781288010 | -2.4548665632 | 0.0000000000 |
| C11 | -2.8674963548 | -1.1861320086 | 0.0000000000 |
| O12 | -2.2882605402 | -0.0419760384 | 0.0000000000 |
| H24 | 0.4495376666  | 4.1047384620  | 0.0000000000 |
| H25 | 2.7510791060  | 3.4756740838  | 0.0000000000 |
| H26 | 3.6029299924  | 1.2076646550  | 0.0000000000 |
| H27 | 3.3417541468  | -1.1633683812 | 0.0000000000 |
| H28 | 1.7244683550  | -3.0893042430 | 0.0000000000 |
| H29 | -0.5669276418 | -3.7559521964 | 0.0000000000 |
| H30 | -2.9472675071 | -3.3085831430 | 0.0000000000 |
| H31 | -3.9659733368 | -1.1520401867 | 0.0000000000 |

energy: -2349.12268838303 hartrees

*Zn(II)Salen-Pyridine:*

32

|     |               |               |               |
|-----|---------------|---------------|---------------|
| Zn1 | -0.0570398574 | -0.2052107547 | 0.0885031933  |
| O1  | -0.1884238762 | -0.0358838025 | 2.1213307897  |
| C2  | 0.7815237355  | 0.1821954309  | 2.9274034821  |
| C3  | 2.1322396515  | 0.3921440207  | 2.6279484990  |
| C4  | 2.6819464569  | 0.4710967814  | 1.3310807940  |
| N5  | 1.9915629939  | 0.3175422201  | 0.2184228078  |
| C6  | 2.5620782473  | 0.4793881996  | -1.0315535042 |
| C7  | 1.7531981792  | 0.4293060140  | -2.1280229500 |
| N8  | 0.3996184047  | 0.2159166188  | -1.9383005890 |
| C9  | -0.4785780521 | 0.3157129057  | -2.9194991693 |
| C10 | -1.8742584776 | 0.2391842829  | -2.7468134045 |
| C11 | -2.5359414472 | 0.1589623871  | -1.5110592144 |
| O12 | -2.0303922490 | 0.0611374666  | -0.3442611404 |
| N13 | -0.0827857972 | -2.3879833990 | 0.0638637282  |
| C14 | -0.4132865814 | -3.0581742963 | 1.1813431128  |
| C15 | -0.4706147111 | -4.4513239125 | 1.2271578546  |
| C16 | -0.1766750754 | -5.1744004169 | 0.0699207496  |
| C17 | 0.1594089101  | -4.4773628976 | -1.0924812366 |
| C18 | 0.1936463361  | -3.0843805734 | -1.0516449819 |
| H19 | -0.6353147652 | -2.4441187578 | 2.0490184925  |
| H20 | -0.7409240823 | -4.9515102697 | 2.1517868991  |
| H21 | -0.2112764139 | -6.2602827173 | 0.0727417970  |



|     |               |               |               |
|-----|---------------|---------------|---------------|
| H22 | 0.3912641065  | -4.9971564881 | -2.0164914711 |
| H23 | 0.4469665484  | -2.4978134877 | -1.9295680713 |
| H24 | 0.5123268515  | 0.2088215842  | 3.9951786606  |
| H25 | 2.8017962485  | 0.5510199869  | 3.4668541235  |
| H26 | 3.7535846815  | 0.6956327093  | 1.2487866294  |
| H27 | 3.6308032212  | 0.6764721268  | -1.1188945174 |
| H28 | 2.1426203147  | 0.5894736961  | -3.1336290480 |
| H29 | -0.1017198395 | 0.4976676235  | -3.9350005286 |
| H30 | -2.4959532130 | 0.3244597762  | -3.6321225263 |
| H31 | -3.6360654841 | 0.2014697992  | -1.5496830738 |

energy: -2597.44228629196 hartrees

## Details of ReaxFF simulations

Initial structures for the in and out conformations of Zn-complex **3b** were recovered from the X-ray crystal structure. The corresponding structures for Ru-complex **3g** were constructed by replacing the zinc atoms for ruthenium, and adding the three carbon monoxide ligands. The simulations were performed under periodic boundary conditions, using a cubic box with a length of 80 Å. An NVT regime was used. The initial structures were equilibrated at 250 K before starting the drives. The resulting structures are presented below. These were used as the starting points for the drives.

For the ruthenium complexes the following bond constraints were used during all simulations to keep the CO-ligands attached:

BOND RESTRAINT 1 221 1.9000 1500.00 0.0500 0.0000000

BOND RESTRAINT 75 223 1.9000 1500.00 0.0500 0.0000000

BOND RESTRAINT 148 225 1.9000 1500.00 0.0500 0.0000000

The first two numbers identify the centers concerned, the third one the equilibrium bond length R12, the fourth and fifth are Force1 and Force2 in the following formula:

$$E_{restraint} = Force1 * \{1.0 - \exp(Force2 * (R_{ij} - R12)^2)\}$$

The final number is the change in bond length per iteration.

### Structures

#### **3b-in:**

|        |      |         |          |         |     |     |         |
|--------|------|---------|----------|---------|-----|-----|---------|
| HETATM | 1 Zn | 5.26700 | 2.35600  | 3.37300 | Zn  | 1 0 | 0.00000 |
| HETATM | 2 P  | 0.00000 | 0.00000  | 3.42000 | P_3 | 1 0 | 0.00000 |
| HETATM | 3 O  | 5.73800 | 0.56300  | 3.96500 | O_3 | 2 0 | 0.00000 |
| HETATM | 4 O  | 6.38700 | 2.33800  | 1.76500 | O_3 | 2 0 | 0.00000 |
| HETATM | 5 N  | 3.34800 | 2.09600  | 2.48400 | N_R | 2 0 | 0.00000 |
| HETATM | 6 N  | 4.51200 | 2.76500  | 5.28100 | N_2 | 3 0 | 0.00000 |
| HETATM | 7 N  | 5.34500 | 4.42900  | 3.40000 | N_2 | 3 0 | 0.00000 |
| HETATM | 8 C  | 1.11500 | 1.20500  | 2.57400 | C_R | 3 0 | 0.00000 |
| HETATM | 9 C  | 0.74700 | 2.03500  | 1.53400 | C_R | 3 0 | 0.00000 |
| HETATM | 10 C | 1.68200 | 2.88700  | 0.98500 | C_R | 3 0 | 0.00000 |
| HETATM | 11 C | 2.97600 | 2.88200  | 1.46600 | C_R | 3 0 | 0.00000 |
| HETATM | 12 C | 2.42700 | 1.29000  | 3.01600 | C_R | 3 0 | 0.00000 |
| HETATM | 13 C | 4.21600 | 4.13200  | 5.48400 | C_R | 3 0 | 0.00000 |
| HETATM | 14 C | 4.65400 | 5.01400  | 4.48300 | C_R | 3 0 | 0.00000 |
| HETATM | 15 C | 4.37500 | 6.37800  | 4.61400 | C_R | 3 0 | 0.00000 |
| HETATM | 16 C | 3.71200 | 6.87000  | 5.72200 | C_R | 3 0 | 0.00000 |
| HETATM | 17 C | 3.28700 | 5.99700  | 6.71000 | C_R | 3 0 | 0.00000 |
| HETATM | 18 C | 3.52400 | 4.65100  | 6.58200 | C_R | 3 0 | 0.00000 |
| HETATM | 19 C | 4.26600 | 1.84500  | 6.16400 | C_3 | 4 0 | 0.00000 |
| HETATM | 20 C | 4.51300 | 0.43400  | 6.00300 | C_R | 3 0 | 0.00000 |
| HETATM | 21 C | 3.99700 | -0.38500 | 7.03700 | C_R | 3 0 | 0.00000 |
| HETATM | 22 C | 4.14200 | -1.74200 | 6.97500 | C_R | 3 0 | 0.00000 |
| HETATM | 23 C | 4.79800 | -2.30400 | 5.89200 | C_R | 3 0 | 0.00000 |
| HETATM | 24 C | 5.35400 | -1.59000 | 4.86600 | C_R | 3 0 | 0.00000 |
| HETATM | 25 C | 5.20600 | -0.14100 | 4.90700 | C_R | 3 0 | 0.00000 |
| HETATM | 26 C | 5.97000 | 5.14100  | 2.52100 | C_3 | 4 0 | 0.00000 |
| HETATM | 27 C | 6.72700 | 4.67300  | 1.38700 | C_R | 3 0 | 0.00000 |

|        |    |    |          |          |          |     |   |   |         |
|--------|----|----|----------|----------|----------|-----|---|---|---------|
| HETATM | 28 | C  | 6.93800  | 3.28300  | 1.08000  | C_R | 3 | 0 | 0.00000 |
| HETATM | 29 | C  | 7.81000  | 2.96000  | -0.02400 | C_R | 3 | 0 | 0.00000 |
| HETATM | 30 | C  | 8.36800  | 3.98800  | -0.73700 | C_R | 3 | 0 | 0.00000 |
| HETATM | 31 | C  | 8.14500  | 5.34100  | -0.45700 | C_R | 3 | 0 | 0.00000 |
| HETATM | 32 | C  | 7.34400  | 5.67400  | 0.59700  | C_R | 3 | 0 | 0.00000 |
| HETATM | 33 | C  | 6.08000  | -2.25500 | 3.69400  | C_3 | 4 | 0 | 0.00000 |
| HETATM | 34 | C  | 7.52600  | -1.80000 | 3.62100  | C_3 | 4 | 0 | 0.00000 |
| HETATM | 35 | C  | 5.33700  | -1.91900 | 2.36500  | C_3 | 4 | 0 | 0.00000 |
| HETATM | 36 | C  | 6.06100  | -3.80200 | 3.85000  | C_3 | 4 | 0 | 0.00000 |
| HETATM | 37 | C  | 8.10300  | 1.49100  | -0.36300 | C_3 | 4 | 0 | 0.00000 |
| HETATM | 38 | C  | 9.07200  | 1.36200  | -1.55400 | C_3 | 4 | 0 | 0.00000 |
| HETATM | 39 | C  | 8.74800  | 0.77700  | 0.84700  | C_3 | 4 | 0 | 0.00000 |
| HETATM | 40 | C  | 6.81100  | 0.75000  | -0.72800 | C_3 | 4 | 0 | 0.00000 |
| HETATM | 41 | H  | -0.14300 | 2.01800  | 1.19700  | H_  | 1 | 0 | 0.00000 |
| HETATM | 42 | H  | 1.43500  | 3.47600  | 0.28100  | H_  | 1 | 0 | 0.00000 |
| HETATM | 43 | H  | 3.62000  | 3.45100  | 1.06400  | H_  | 1 | 0 | 0.00000 |
| HETATM | 44 | H  | 2.68500  | 0.73700  | 3.74300  | H_  | 1 | 0 | 0.00000 |
| HETATM | 45 | H  | 4.64900  | 6.97800  | 3.92900  | H_  | 1 | 0 | 0.00000 |
| HETATM | 46 | H  | 3.54700  | 7.80200  | 5.80800  | H_  | 1 | 0 | 0.00000 |
| HETATM | 47 | H  | 2.83200  | 6.33000  | 7.47600  | H_  | 1 | 0 | 0.00000 |
| HETATM | 48 | H  | 3.20900  | 4.05800  | 7.25400  | H_  | 1 | 0 | 0.00000 |
| HETATM | 49 | H  | 3.88800  | 2.12700  | 6.98900  | H_  | 1 | 0 | 0.00000 |
| HETATM | 50 | H  | 3.54900  | 0.01100  | 7.77800  | H_  | 1 | 0 | 0.00000 |
| HETATM | 51 | H  | 3.79200  | -2.29300 | 7.66700  | H_  | 1 | 0 | 0.00000 |
| HETATM | 52 | H  | 4.86900  | -3.25100 | 5.86100  | H_  | 1 | 0 | 0.00000 |
| HETATM | 53 | H  | 5.92800  | 6.08200  | 2.63700  | H_  | 1 | 0 | 0.00000 |
| HETATM | 54 | H  | 8.93800  | 3.76900  | -1.46100 | H_  | 1 | 0 | 0.00000 |
| HETATM | 55 | H  | 8.54600  | 6.01700  | -0.99000 | H_  | 1 | 0 | 0.00000 |
| HETATM | 56 | H  | 7.19700  | 6.59000  | 0.80500  | H_  | 1 | 0 | 0.00000 |
| HETATM | 57 | H  | 7.55800  | -0.82600 | 3.52100  | H_  | 1 | 0 | 0.00000 |
| HETATM | 58 | H  | 7.96300  | -2.22100 | 2.84900  | H_  | 1 | 0 | 0.00000 |
| HETATM | 59 | H  | 7.99300  | -2.06000 | 4.44200  | H_  | 1 | 0 | 0.00000 |
| HETATM | 60 | H  | 5.41800  | -0.96100 | 2.17600  | H_  | 1 | 0 | 0.00000 |
| HETATM | 61 | H  | 4.39100  | -2.15600 | 2.45200  | H_  | 1 | 0 | 0.00000 |
| HETATM | 62 | H  | 5.73700  | -2.43000 | 1.63100  | H_  | 1 | 0 | 0.00000 |
| HETATM | 63 | H  | 6.40500  | -4.21700 | 3.02900  | H_  | 1 | 0 | 0.00000 |
| HETATM | 64 | H  | 5.14400  | -4.10300 | 4.00800  | H_  | 1 | 0 | 0.00000 |
| HETATM | 65 | H  | 6.62800  | -4.06000 | 4.60700  | H_  | 1 | 0 | 0.00000 |
| HETATM | 66 | H  | 8.66700  | 1.76700  | -2.35100 | H_  | 1 | 0 | 0.00000 |
| HETATM | 67 | H  | 9.25300  | 0.41600  | -1.72600 | H_  | 1 | 0 | 0.00000 |
| HETATM | 68 | H  | 9.91200  | 1.82300  | -1.34500 | H_  | 1 | 0 | 0.00000 |
| HETATM | 69 | H  | 9.59900  | 1.21200  | 1.07000  | H_  | 1 | 0 | 0.00000 |
| HETATM | 70 | H  | 8.91300  | -0.16300 | 0.62500  | H_  | 1 | 0 | 0.00000 |
| HETATM | 71 | H  | 8.14300  | 0.82800  | 1.61500  | H_  | 1 | 0 | 0.00000 |
| HETATM | 72 | H  | 6.20400  | 0.75700  | 0.04200  | H_  | 1 | 0 | 0.00000 |
| HETATM | 73 | H  | 7.02200  | -0.17500 | -0.96900 | H_  | 1 | 0 | 0.00000 |
| HETATM | 74 | H  | 6.38500  | 1.19600  | -1.48800 | H_  | 1 | 0 | 0.00000 |
| HETATM | 75 | Zn | -4.67400 | 3.38300  | 3.37300  | Zn  | 1 | 0 | 0.00000 |
| HETATM | 76 | O  | -3.35700 | 4.68900  | 3.96500  | O_3 | 2 | 0 | 0.00000 |
| HETATM | 77 | O  | -5.21800 | 4.36200  | 1.76500  | O_3 | 2 | 0 | 0.00000 |

|        |       |          |          |          |     |     |         |
|--------|-------|----------|----------|----------|-----|-----|---------|
| HETATM | 78 N  | -3.48900 | 1.85200  | 2.48400  | N_R | 2 0 | 0.00000 |
| HETATM | 79 N  | -4.65100 | 2.52600  | 5.28100  | N_2 | 3 0 | 0.00000 |
| HETATM | 80 N  | -6.50700 | 2.41400  | 3.40000  | N_2 | 3 0 | 0.00000 |
| HETATM | 81 C  | -1.60100 | 0.36300  | 2.57400  | C_R | 3 0 | 0.00000 |
| HETATM | 82 C  | -2.13500 | -0.37000 | 1.53400  | C_R | 3 0 | 0.00000 |
| HETATM | 83 C  | -3.34100 | 0.01300  | 0.98500  | C_R | 3 0 | 0.00000 |
| HETATM | 84 C  | -3.98400 | 1.13700  | 1.46600  | C_R | 3 0 | 0.00000 |
| HETATM | 85 C  | -2.33100 | 1.45600  | 3.01600  | C_R | 3 0 | 0.00000 |
| HETATM | 86 C  | -5.68700 | 1.58500  | 5.48400  | C_R | 3 0 | 0.00000 |
| HETATM | 87 C  | -6.66900 | 1.52300  | 4.48300  | C_R | 3 0 | 0.00000 |
| HETATM | 88 C  | -7.71100 | 0.60000  | 4.61400  | C_R | 3 0 | 0.00000 |
| HETATM | 89 C  | -7.80500 | -0.22000 | 5.72200  | C_R | 3 0 | 0.00000 |
| HETATM | 90 C  | -6.83700 | -0.15200 | 6.71000  | C_R | 3 0 | 0.00000 |
| HETATM | 91 C  | -5.79000 | 0.72600  | 6.58200  | C_R | 3 0 | 0.00000 |
| HETATM | 92 C  | -3.73100 | 2.77200  | 6.16400  | C_3 | 4 0 | 0.00000 |
| HETATM | 93 C  | -2.63200 | 3.69200  | 6.00300  | C_R | 3 0 | 0.00000 |
| HETATM | 94 C  | -1.66500 | 3.65400  | 7.03700  | C_R | 3 0 | 0.00000 |
| HETATM | 95 C  | -0.56200 | 4.45800  | 6.97500  | C_R | 3 0 | 0.00000 |
| HETATM | 96 C  | -0.40400 | 5.30700  | 5.89200  | C_R | 3 0 | 0.00000 |
| HETATM | 97 C  | -1.30000 | 5.43200  | 4.86600  | C_R | 3 0 | 0.00000 |
| HETATM | 98 C  | -2.48100 | 4.57900  | 4.90700  | C_R | 3 0 | 0.00000 |
| HETATM | 99 C  | -7.43700 | 2.60000  | 2.52100  | C_3 | 4 0 | 0.00000 |
| HETATM | 100 C | -7.41000 | 3.48900  | 1.38700  | C_R | 3 0 | 0.00000 |
| HETATM | 101 C | -6.31300 | 4.36700  | 1.08000  | C_R | 3 0 | 0.00000 |
| HETATM | 102 C | -6.46800 | 5.28300  | -0.02400 | C_R | 3 0 | 0.00000 |
| HETATM | 103 C | -7.63700 | 5.25300  | -0.73700 | C_R | 3 0 | 0.00000 |
| HETATM | 104 C | -8.69800 | 4.38400  | -0.45700 | C_R | 3 0 | 0.00000 |
| HETATM | 105 C | -8.58600 | 3.52300  | 0.59700  | C_R | 3 0 | 0.00000 |
| HETATM | 106 C | -1.08700 | 6.39300  | 3.69400  | C_3 | 4 0 | 0.00000 |
| HETATM | 107 C | -2.20400 | 7.41700  | 3.62100  | C_3 | 4 0 | 0.00000 |
| HETATM | 108 C | -1.00700 | 5.58200  | 2.36500  | C_3 | 4 0 | 0.00000 |
| HETATM | 109 C | 0.26200  | 7.15000  | 3.85000  | C_3 | 4 0 | 0.00000 |
| HETATM | 110 C | -5.34200 | 6.27200  | -0.36300 | C_3 | 4 0 | 0.00000 |
| HETATM | 111 C | -5.71600 | 7.17500  | -1.55400 | C_3 | 4 0 | 0.00000 |
| HETATM | 112 C | -5.04700 | 7.18800  | 0.84700  | C_3 | 4 0 | 0.00000 |
| HETATM | 113 C | -4.05500 | 5.52400  | -0.72800 | C_3 | 4 0 | 0.00000 |
| HETATM | 114 H | -1.67600 | -1.13300 | 1.19700  | H_  | 1 0 | 0.00000 |
| HETATM | 115 H | -3.72800 | -0.49500 | 0.28100  | H_  | 1 0 | 0.00000 |
| HETATM | 116 H | -4.79900 | 1.40900  | 1.06400  | H_  | 1 0 | 0.00000 |
| HETATM | 117 H | -1.98100 | 1.95700  | 3.74300  | H_  | 1 0 | 0.00000 |
| HETATM | 118 H | -8.36800 | 0.53700  | 3.92900  | H_  | 1 0 | 0.00000 |
| HETATM | 119 H | -8.53000 | -0.82900 | 5.80800  | H_  | 1 0 | 0.00000 |
| HETATM | 120 H | -6.89800 | -0.71200 | 7.47600  | H_  | 1 0 | 0.00000 |
| HETATM | 121 H | -5.11900 | 0.75000  | 7.25400  | H_  | 1 0 | 0.00000 |
| HETATM | 122 H | -3.78600 | 2.30400  | 6.98900  | H_  | 1 0 | 0.00000 |
| HETATM | 123 H | -1.78400 | 3.06800  | 7.77800  | H_  | 1 0 | 0.00000 |
| HETATM | 124 H | 0.09000  | 4.43100  | 7.66700  | H_  | 1 0 | 0.00000 |
| HETATM | 125 H | 0.38100  | 5.84200  | 5.86100  | H_  | 1 0 | 0.00000 |
| HETATM | 126 H | -8.23100 | 2.09200  | 2.63700  | H_  | 1 0 | 0.00000 |
| HETATM | 127 H | -7.73300 | 5.85600  | -1.46100 | H_  | 1 0 | 0.00000 |

|        |     |    |          |          |          |     |   |   |         |
|--------|-----|----|----------|----------|----------|-----|---|---|---------|
| HETATM | 128 | H  | -9.48400 | 4.39300  | -0.99000 | H_  | 1 | 0 | 0.00000 |
| HETATM | 129 | H  | -9.30600 | 2.93800  | 0.80500  | H_  | 1 | 0 | 0.00000 |
| HETATM | 130 | H  | -3.06400 | 6.95800  | 3.52100  | H_  | 1 | 0 | 0.00000 |
| HETATM | 131 | H  | -2.05800 | 8.00600  | 2.84900  | H_  | 1 | 0 | 0.00000 |
| HETATM | 132 | H  | -2.21300 | 7.95200  | 4.44200  | H_  | 1 | 0 | 0.00000 |
| HETATM | 133 | H  | -1.87700 | 5.17300  | 2.17600  | H_  | 1 | 0 | 0.00000 |
| HETATM | 134 | H  | -0.32900 | 4.88000  | 2.45200  | H_  | 1 | 0 | 0.00000 |
| HETATM | 135 | H  | -0.76400 | 6.18300  | 1.63100  | H_  | 1 | 0 | 0.00000 |
| HETATM | 136 | H  | 0.45000  | 7.65600  | 3.02900  | H_  | 1 | 0 | 0.00000 |
| HETATM | 137 | H  | 0.98200  | 6.50700  | 4.00800  | H_  | 1 | 0 | 0.00000 |
| HETATM | 138 | H  | 0.20200  | 7.77000  | 4.60700  | H_  | 1 | 0 | 0.00000 |
| HETATM | 139 | H  | -5.86400 | 6.62200  | -2.35100 | H_  | 1 | 0 | 0.00000 |
| HETATM | 140 | H  | -4.98700 | 7.80600  | -1.72600 | H_  | 1 | 0 | 0.00000 |
| HETATM | 141 | H  | -6.53500 | 7.67200  | -1.34500 | H_  | 1 | 0 | 0.00000 |
| HETATM | 142 | H  | -5.84900 | 7.70600  | 1.07000  | H_  | 1 | 0 | 0.00000 |
| HETATM | 143 | H  | -4.31600 | 7.80000  | 0.62500  | H_  | 1 | 0 | 0.00000 |
| HETATM | 144 | H  | -4.78800 | 6.63900  | 1.61500  | H_  | 1 | 0 | 0.00000 |
| HETATM | 145 | H  | -3.75800 | 4.99400  | 0.04200  | H_  | 1 | 0 | 0.00000 |
| HETATM | 146 | H  | -3.35900 | 6.16900  | -0.96900 | H_  | 1 | 0 | 0.00000 |
| HETATM | 147 | H  | -4.22800 | 4.93100  | -1.48800 | H_  | 1 | 0 | 0.00000 |
| HETATM | 148 | Zn | -0.59300 | -5.74000 | 3.37300  | Zn  | 1 | 0 | 0.00000 |
| HETATM | 149 | O  | -2.38300 | -5.25100 | 3.96500  | O_3 | 2 | 0 | 0.00000 |
| HETATM | 150 | O  | -1.16900 | -6.70000 | 1.76500  | O_3 | 2 | 0 | 0.00000 |
| HETATM | 151 | N  | 0.14000  | -3.94700 | 2.48400  | N_R | 2 | 0 | 0.00000 |
| HETATM | 152 | N  | 0.13700  | -5.29000 | 5.28100  | N_2 | 3 | 0 | 0.00000 |
| HETATM | 153 | N  | 1.16400  | -6.84300 | 3.40000  | N_2 | 3 | 0 | 0.00000 |
| HETATM | 154 | C  | 0.48600  | -1.56800 | 2.57400  | C_R | 3 | 0 | 0.00000 |
| HETATM | 155 | C  | 1.38900  | -1.66400 | 1.53400  | C_R | 3 | 0 | 0.00000 |
| HETATM | 156 | C  | 1.66000  | -2.90000 | 0.98500  | C_R | 3 | 0 | 0.00000 |
| HETATM | 157 | C  | 1.00800  | -4.01900 | 1.46600  | C_R | 3 | 0 | 0.00000 |
| HETATM | 158 | C  | -0.09600 | -2.74700 | 3.01600  | C_R | 3 | 0 | 0.00000 |
| HETATM | 159 | C  | 1.47100  | -5.71700 | 5.48400  | C_R | 3 | 0 | 0.00000 |
| HETATM | 160 | C  | 2.01600  | -6.53700 | 4.48300  | C_R | 3 | 0 | 0.00000 |
| HETATM | 161 | C  | 3.33600  | -6.97800 | 4.61400  | C_R | 3 | 0 | 0.00000 |
| HETATM | 162 | C  | 4.09400  | -6.64900 | 5.72200  | C_R | 3 | 0 | 0.00000 |
| HETATM | 163 | C  | 3.55000  | -5.84500 | 6.71000  | C_R | 3 | 0 | 0.00000 |
| HETATM | 164 | C  | 2.26600  | -5.37700 | 6.58200  | C_R | 3 | 0 | 0.00000 |
| HETATM | 165 | C  | -0.53500 | -4.61700 | 6.16400  | C_3 | 4 | 0 | 0.00000 |
| HETATM | 166 | C  | -1.88100 | -4.12500 | 6.00300  | C_R | 3 | 0 | 0.00000 |
| HETATM | 167 | C  | -2.33200 | -3.26900 | 7.03700  | C_R | 3 | 0 | 0.00000 |
| HETATM | 168 | C  | -3.57900 | -2.71600 | 6.97500  | C_R | 3 | 0 | 0.00000 |
| HETATM | 169 | C  | -4.39400 | -3.00300 | 5.89200  | C_R | 3 | 0 | 0.00000 |
| HETATM | 170 | C  | -4.05400 | -3.84100 | 4.86600  | C_R | 3 | 0 | 0.00000 |
| HETATM | 171 | C  | -2.72500 | -4.43800 | 4.90700  | C_R | 3 | 0 | 0.00000 |
| HETATM | 172 | C  | 1.46700  | -7.74100 | 2.52100  | C_3 | 4 | 0 | 0.00000 |
| HETATM | 173 | C  | 0.68300  | -8.16200 | 1.38700  | C_R | 3 | 0 | 0.00000 |
| HETATM | 174 | C  | -0.62600 | -7.65000 | 1.08000  | C_R | 3 | 0 | 0.00000 |
| HETATM | 175 | C  | -1.34200 | -8.24300 | -0.02400 | C_R | 3 | 0 | 0.00000 |
| HETATM | 176 | C  | -0.73000 | -9.24100 | -0.73700 | C_R | 3 | 0 | 0.00000 |
| HETATM | 177 | C  | 0.55300  | -9.72500 | -0.45700 | C_R | 3 | 0 | 0.00000 |

|        |     |   |          |           |          |     |   |   |         |
|--------|-----|---|----------|-----------|----------|-----|---|---|---------|
| HETATM | 178 | C | 1.24100  | -9.19700  | 0.59700  | C_R | 3 | 0 | 0.00000 |
| HETATM | 179 | C | -4.99300 | -4.13800  | 3.69400  | C_3 | 4 | 0 | 0.00000 |
| HETATM | 180 | C | -5.32100 | -5.61800  | 3.62100  | C_3 | 4 | 0 | 0.00000 |
| HETATM | 181 | C | -4.33000 | -3.66300  | 2.36500  | C_3 | 4 | 0 | 0.00000 |
| HETATM | 182 | C | -6.32300 | -3.34800  | 3.85000  | C_3 | 4 | 0 | 0.00000 |
| HETATM | 183 | C | -2.76000 | -7.76200  | -0.36300 | C_3 | 4 | 0 | 0.00000 |
| HETATM | 184 | C | -3.35600 | -8.53800  | -1.55400 | C_3 | 4 | 0 | 0.00000 |
| HETATM | 185 | C | -3.70100 | -7.96500  | 0.84700  | C_3 | 4 | 0 | 0.00000 |
| HETATM | 186 | C | -2.75600 | -6.27400  | -0.72800 | C_3 | 4 | 0 | 0.00000 |
| HETATM | 187 | H | 1.81900  | -0.88500  | 1.19700  | H_  | 1 | 0 | 0.00000 |
| HETATM | 188 | H | 2.29300  | -2.98100  | 0.28100  | H_  | 1 | 0 | 0.00000 |
| HETATM | 189 | H | 1.17900  | -4.86100  | 1.06400  | H_  | 1 | 0 | 0.00000 |
| HETATM | 190 | H | -0.70400 | -2.69400  | 3.74300  | H_  | 1 | 0 | 0.00000 |
| HETATM | 191 | H | 3.71900  | -7.51500  | 3.92900  | H_  | 1 | 0 | 0.00000 |
| HETATM | 192 | H | 4.98300  | -6.97300  | 5.80800  | H_  | 1 | 0 | 0.00000 |
| HETATM | 193 | H | 4.06500  | -5.61800  | 7.47600  | H_  | 1 | 0 | 0.00000 |
| HETATM | 194 | H | 1.91000  | -4.80800  | 7.25400  | H_  | 1 | 0 | 0.00000 |
| HETATM | 195 | H | -0.10200 | -4.43100  | 6.98900  | H_  | 1 | 0 | 0.00000 |
| HETATM | 196 | H | -1.76500 | -3.07900  | 7.77800  | H_  | 1 | 0 | 0.00000 |
| HETATM | 197 | H | -3.88200 | -2.13800  | 7.66700  | H_  | 1 | 0 | 0.00000 |
| HETATM | 198 | H | -5.24900 | -2.59100  | 5.86100  | H_  | 1 | 0 | 0.00000 |
| HETATM | 199 | H | 2.30300  | -8.17400  | 2.63700  | H_  | 1 | 0 | 0.00000 |
| HETATM | 200 | H | -1.20500 | -9.62500  | -1.46100 | H_  | 1 | 0 | 0.00000 |
| HETATM | 201 | H | 0.93800  | -10.41000 | -0.99000 | H_  | 1 | 0 | 0.00000 |
| HETATM | 202 | H | 2.10800  | -9.52800  | 0.80500  | H_  | 1 | 0 | 0.00000 |
| HETATM | 203 | H | -4.49400 | -6.13300  | 3.52100  | H_  | 1 | 0 | 0.00000 |
| HETATM | 204 | H | -5.90500 | -5.78600  | 2.84900  | H_  | 1 | 0 | 0.00000 |
| HETATM | 205 | H | -5.78000 | -5.89200  | 4.44200  | H_  | 1 | 0 | 0.00000 |
| HETATM | 206 | H | -3.54200 | -4.21200  | 2.17600  | H_  | 1 | 0 | 0.00000 |
| HETATM | 207 | H | -4.06200 | -2.72500  | 2.45200  | H_  | 1 | 0 | 0.00000 |
| HETATM | 208 | H | -4.97300 | -3.75300  | 1.63100  | H_  | 1 | 0 | 0.00000 |
| HETATM | 209 | H | -6.85500 | -3.43900  | 3.02900  | H_  | 1 | 0 | 0.00000 |
| HETATM | 210 | H | -6.12600 | -2.40300  | 4.00800  | H_  | 1 | 0 | 0.00000 |
| HETATM | 211 | H | -6.83000 | -3.71000  | 4.60700  | H_  | 1 | 0 | 0.00000 |
| HETATM | 212 | H | -2.80300 | -8.38900  | -2.35100 | H_  | 1 | 0 | 0.00000 |
| HETATM | 213 | H | -4.26700 | -8.22100  | -1.72600 | H_  | 1 | 0 | 0.00000 |
| HETATM | 214 | H | -3.37700 | -9.49500  | -1.34500 | H_  | 1 | 0 | 0.00000 |
| HETATM | 215 | H | -3.74900 | -8.91900  | 1.07000  | H_  | 1 | 0 | 0.00000 |
| HETATM | 216 | H | -4.59700 | -7.63800  | 0.62500  | H_  | 1 | 0 | 0.00000 |
| HETATM | 217 | H | -3.35500 | -7.46600  | 1.61500  | H_  | 1 | 0 | 0.00000 |
| HETATM | 218 | H | -2.44600 | -5.75100  | 0.04200  | H_  | 1 | 0 | 0.00000 |
| HETATM | 219 | H | -3.66300 | -5.99400  | -0.96900 | H_  | 1 | 0 | 0.00000 |
| HETATM | 220 | H | -2.15600 | -6.12700  | -1.48800 | H_  | 1 | 0 | 0.00000 |

**3b-out:**

|        |   |    |          |         |          |     |   |   |         |
|--------|---|----|----------|---------|----------|-----|---|---|---------|
| HETATM | 1 | Zn | 6.05100  | 7.34300 | 8.34700  | Zn  | 1 | 0 | 0.00000 |
| HETATM | 2 | P  | 10.43200 | 6.02300 | 11.98800 | P_3 | 1 | 0 | 0.00000 |
| HETATM | 3 | O  | 5.47800  | 5.72200 | 9.31100  | O_3 | 2 | 0 | 0.00000 |
| HETATM | 4 | O  | 4.58700  | 8.49300 | 8.95800  | O_3 | 2 | 0 | 0.00000 |
| HETATM | 5 | N  | 7.53400  | 7.89700 | 9.74900  | N_R | 2 | 0 | 0.00000 |

|        |      |         |          |          |     |     |         |
|--------|------|---------|----------|----------|-----|-----|---------|
| HETATM | 6 N  | 7.01600 | 6.16100  | 6.94700  | N_2 | 3 0 | 0.00000 |
| HETATM | 7 N  | 6.37700 | 8.73600  | 6.80300  | N_2 | 3 0 | 0.00000 |
| HETATM | 8 C  | 9.32800 | 7.25700  | 11.21400 | C_R | 3 0 | 0.00000 |
| HETATM | 9 C  | 8.42300 | 6.99600  | 10.20000 | C_R | 3 0 | 0.00000 |
| HETATM | 10 C | 7.53200 | 9.10700  | 10.31300 | C_R | 3 0 | 0.00000 |
| HETATM | 11 C | 8.41100 | 9.46600  | 11.32200 | C_R | 3 0 | 0.00000 |
| HETATM | 12 C | 9.30800 | 8.53200  | 11.77200 | C_R | 3 0 | 0.00000 |
| HETATM | 13 C | 7.49900 | 6.87300  | 5.81400  | C_R | 3 0 | 0.00000 |
| HETATM | 14 C | 8.22600 | 6.30100  | 4.77400  | C_R | 3 0 | 0.00000 |
| HETATM | 15 C | 8.61900 | 7.06100  | 3.69100  | C_R | 3 0 | 0.00000 |
| HETATM | 16 C | 8.31800 | 8.40400  | 3.63500  | C_R | 3 0 | 0.00000 |
| HETATM | 17 C | 7.60900 | 8.99100  | 4.64600  | C_R | 3 0 | 0.00000 |
| HETATM | 18 C | 7.18000 | 8.24500  | 5.74400  | C_R | 3 0 | 0.00000 |
| HETATM | 19 C | 7.12100 | 4.87100  | 7.02900  | C_3 | 4 0 | 0.00000 |
| HETATM | 20 C | 6.58000 | 4.01700  | 8.05600  | C_R | 3 0 | 0.00000 |
| HETATM | 21 C | 5.74400 | 4.46700  | 9.11600  | C_R | 3 0 | 0.00000 |
| HETATM | 22 C | 5.14700 | 3.48000  | 9.98300  | C_R | 3 0 | 0.00000 |
| HETATM | 23 C | 5.44400 | 2.15700  | 9.75200  | C_R | 3 0 | 0.00000 |
| HETATM | 24 C | 6.29400 | 1.71500  | 8.73400  | C_R | 3 0 | 0.00000 |
| HETATM | 25 C | 6.84700 | 2.64000  | 7.90300  | C_R | 3 0 | 0.00000 |
| HETATM | 26 C | 5.96600 | 9.95400  | 6.83300  | C_3 | 4 0 | 0.00000 |
| HETATM | 27 C | 5.08600 | 10.52900 | 7.80600  | C_R | 3 0 | 0.00000 |
| HETATM | 28 C | 4.86700 | 11.93100 | 7.69100  | C_R | 3 0 | 0.00000 |
| HETATM | 29 C | 4.01300 | 12.55300 | 8.54900  | C_R | 3 0 | 0.00000 |
| HETATM | 30 C | 3.33400 | 11.81000 | 9.52100  | C_R | 3 0 | 0.00000 |
| HETATM | 31 C | 3.50100 | 10.45100 | 9.69200  | C_R | 3 0 | 0.00000 |
| HETATM | 32 C | 4.40900 | 9.77200  | 8.81200  | C_R | 3 0 | 0.00000 |
| HETATM | 33 C | 4.21900 | 3.91700  | 11.12500 | C_3 | 4 0 | 0.00000 |
| HETATM | 34 C | 5.00300 | 4.80600  | 12.10700 | C_3 | 4 0 | 0.00000 |
| HETATM | 35 C | 3.67000 | 2.71000  | 11.89500 | C_3 | 4 0 | 0.00000 |
| HETATM | 36 C | 3.00800 | 4.68200  | 10.56100 | C_3 | 4 0 | 0.00000 |
| HETATM | 37 C | 2.79100 | 9.66200  | 10.81000 | C_3 | 4 0 | 0.00000 |
| HETATM | 38 C | 1.83700 | 10.55400 | 11.60100 | C_3 | 4 0 | 0.00000 |
| HETATM | 39 C | 3.83000 | 9.09400  | 11.78100 | C_3 | 4 0 | 0.00000 |
| HETATM | 40 C | 1.94900 | 8.53600  | 10.21500 | C_3 | 4 0 | 0.00000 |
| HETATM | 41 H | 8.43000 | 6.13400  | 9.80100  | H_  | 1 0 | 0.00000 |
| HETATM | 42 H | 6.89900 | 9.74800  | 10.01300 | H_  | 1 0 | 0.00000 |
| HETATM | 43 H | 8.39600 | 10.33900 | 11.69100 | H_  | 1 0 | 0.00000 |
| HETATM | 44 H | 9.91500 | 8.75600  | 12.46900 | H_  | 1 0 | 0.00000 |
| HETATM | 45 H | 8.45200 | 5.37700  | 4.80800  | H_  | 1 0 | 0.00000 |
| HETATM | 46 H | 9.10300 | 6.65700  | 2.98100  | H_  | 1 0 | 0.00000 |
| HETATM | 47 H | 8.60400 | 8.92300  | 2.89100  | H_  | 1 0 | 0.00000 |
| HETATM | 48 H | 7.40400 | 9.91800  | 4.60100  | H_  | 1 0 | 0.00000 |
| HETATM | 49 H | 7.60900 | 4.44100  | 6.33300  | H_  | 1 0 | 0.00000 |
| HETATM | 50 H | 5.04700 | 1.50700  | 10.32000 | H_  | 1 0 | 0.00000 |
| HETATM | 51 H | 6.48200 | 0.79000  | 8.62500  | H_  | 1 0 | 0.00000 |
| HETATM | 52 H | 7.42100 | 2.35300  | 7.20600  | H_  | 1 0 | 0.00000 |
| HETATM | 53 H | 6.27500 | 10.52900 | 6.14200  | H_  | 1 0 | 0.00000 |
| HETATM | 54 H | 5.31400 | 12.43200 | 7.02100  | H_  | 1 0 | 0.00000 |
| HETATM | 55 H | 3.88000 | 13.49200 | 8.48800  | H_  | 1 0 | 0.00000 |



|        |       |          |          |          |     |     |         |
|--------|-------|----------|----------|----------|-----|-----|---------|
| HETATM | 56 H  | 2.72500  | 12.26500 | 10.09200 | H_  | 1 0 | 0.00000 |
| HETATM | 57 H  | 5.75800  | 4.30200  | 12.47500 | H_  | 1 0 | 0.00000 |
| HETATM | 58 H  | 4.41100  | 5.08800  | 12.83500 | H_  | 1 0 | 0.00000 |
| HETATM | 59 H  | 5.33700  | 5.59800  | 11.63800 | H_  | 1 0 | 0.00000 |
| HETATM | 60 H  | 4.41600  | 2.20300  | 12.27900 | H_  | 1 0 | 0.00000 |
| HETATM | 61 H  | 3.16500  | 2.13600  | 11.28300 | H_  | 1 0 | 0.00000 |
| HETATM | 62 H  | 3.08100  | 3.02300  | 12.61200 | H_  | 1 0 | 0.00000 |
| HETATM | 63 H  | 2.43500  | 4.97600  | 11.29900 | H_  | 1 0 | 0.00000 |
| HETATM | 64 H  | 2.49700  | 4.09400  | 9.96500  | H_  | 1 0 | 0.00000 |
| HETATM | 65 H  | 3.32000  | 5.46400  | 10.06000 | H_  | 1 0 | 0.00000 |
| HETATM | 66 H  | 1.17400  | 10.94400 | 10.99200 | H_  | 1 0 | 0.00000 |
| HETATM | 67 H  | 2.34500  | 11.27200 | 12.03500 | H_  | 1 0 | 0.00000 |
| HETATM | 68 H  | 1.38000  | 10.01900 | 12.28400 | H_  | 1 0 | 0.00000 |
| HETATM | 69 H  | 3.37400  | 8.59700  | 12.49100 | H_  | 1 0 | 0.00000 |
| HETATM | 70 H  | 4.34400  | 9.83000  | 12.17300 | H_  | 1 0 | 0.00000 |
| HETATM | 71 H  | 4.43500  | 8.49400  | 11.29900 | H_  | 1 0 | 0.00000 |
| HETATM | 72 H  | 1.26600  | 8.91500  | 9.62100  | H_  | 1 0 | 0.00000 |
| HETATM | 73 H  | 1.51500  | 8.03700  | 10.93900 | H_  | 1 0 | 0.00000 |
| HETATM | 74 H  | 2.52700  | 7.93200  | 9.70000  | H_  | 1 0 | 0.00000 |
| HETATM | 75 Zn | 11.47900 | 1.56900  | 8.34700  | Zn  | 1 0 | 0.00000 |
| HETATM | 76 O  | 13.17000 | 1.88300  | 9.31100  | O_3 | 2 0 | 0.00000 |
| HETATM | 77 O  | 11.21600 | -0.27500 | 8.95800  | O_3 | 2 0 | 0.00000 |
| HETATM | 78 N  | 10.25800 | 2.57700  | 9.74900  | N_R | 2 0 | 0.00000 |
| HETATM | 79 N  | 12.02000 | 2.99600  | 6.94700  | N_2 | 3 0 | 0.00000 |
| HETATM | 80 N  | 10.11000 | 1.15500  | 6.80300  | N_2 | 3 0 | 0.00000 |
| HETATM | 81 C  | 9.91600  | 4.45000  | 11.21400 | C_R | 3 0 | 0.00000 |
| HETATM | 82 C  | 10.59400 | 3.79600  | 10.20000 | C_R | 3 0 | 0.00000 |
| HETATM | 83 C  | 9.21200  | 1.97000  | 10.31300 | C_R | 3 0 | 0.00000 |
| HETATM | 84 C  | 8.46100  | 2.55100  | 11.32200 | C_R | 3 0 | 0.00000 |
| HETATM | 85 C  | 8.82100  | 3.79500  | 11.77200 | C_R | 3 0 | 0.00000 |
| HETATM | 86 C  | 11.16200 | 3.05700  | 5.81400  | C_R | 3 0 | 0.00000 |
| HETATM | 87 C  | 11.29500 | 3.97300  | 4.77400  | C_R | 3 0 | 0.00000 |
| HETATM | 88 C  | 10.44000 | 3.93400  | 3.69100  | C_R | 3 0 | 0.00000 |
| HETATM | 89 C  | 9.42800  | 3.00100  | 3.63500  | C_R | 3 0 | 0.00000 |
| HETATM | 90 C  | 9.27300  | 2.09400  | 4.64600  | C_R | 3 0 | 0.00000 |
| HETATM | 91 C  | 10.13400 | 2.09600  | 5.74400  | C_R | 3 0 | 0.00000 |
| HETATM | 92 C  | 13.08500 | 3.73100  | 7.02900  | C_3 | 4 0 | 0.00000 |
| HETATM | 93 C  | 14.09600 | 3.69000  | 8.05600  | C_R | 3 0 | 0.00000 |
| HETATM | 94 C  | 14.12400 | 2.74100  | 9.11600  | C_R | 3 0 | 0.00000 |
| HETATM | 95 C  | 15.27700 | 2.71800  | 9.98300  | C_R | 3 0 | 0.00000 |
| HETATM | 96 C  | 16.27400 | 3.63600  | 9.75200  | C_R | 3 0 | 0.00000 |
| HETATM | 97 C  | 16.23300 | 4.59300  | 8.73400  | C_R | 3 0 | 0.00000 |
| HETATM | 98 C  | 15.15500 | 4.60900  | 7.90300  | C_R | 3 0 | 0.00000 |
| HETATM | 99 C  | 9.26100  | 0.19000  | 6.83300  | C_3 | 4 0 | 0.00000 |
| HETATM | 100 C | 9.20300  | -0.86000 | 7.80600  | C_R | 3 0 | 0.00000 |
| HETATM | 101 C | 8.09900  | -1.75100 | 7.69100  | C_R | 3 0 | 0.00000 |
| HETATM | 102 C | 7.98700  | -2.80100 | 8.54900  | C_R | 3 0 | 0.00000 |
| HETATM | 103 C | 8.97000  | -3.01800 | 9.52100  | C_R | 3 0 | 0.00000 |
| HETATM | 104 C | 10.06300 | -2.19400 | 9.69200  | C_R | 3 0 | 0.00000 |
| HETATM | 105 C | 10.19700 | -1.06800 | 8.81200  | C_R | 3 0 | 0.00000 |



|        |     |    |          |          |          |     |   |   |         |
|--------|-----|----|----------|----------|----------|-----|---|---|---------|
| HETATM | 106 | C  | 15.36200 | 1.69500  | 11.12500 | C_3 | 4 | 0 | 0.00000 |
| HETATM | 107 | C  | 14.20000 | 1.93000  | 12.10700 | C_3 | 4 | 0 | 0.00000 |
| HETATM | 108 | C  | 16.68200 | 1.82300  | 11.89500 | C_3 | 4 | 0 | 0.00000 |
| HETATM | 109 | C  | 15.30600 | 0.26400  | 10.56100 | C_3 | 4 | 0 | 0.00000 |
| HETATM | 110 | C  | 11.10200 | -2.41400 | 10.81000 | C_3 | 4 | 0 | 0.00000 |
| HETATM | 111 | C  | 10.80600 | -3.68600 | 11.60100 | C_3 | 4 | 0 | 0.00000 |
| HETATM | 112 | C  | 11.07400 | -1.23100 | 11.78100 | C_3 | 4 | 0 | 0.00000 |
| HETATM | 113 | C  | 12.49800 | -2.58000 | 10.21500 | C_3 | 4 | 0 | 0.00000 |
| HETATM | 114 | H  | 11.33700 | 4.23400  | 9.80100  | H_  | 1 | 0 | 0.00000 |
| HETATM | 115 | H  | 8.97300  | 1.10000  | 10.01300 | H_  | 1 | 0 | 0.00000 |
| HETATM | 116 | H  | 7.71300  | 2.10100  | 11.69100 | H_  | 1 | 0 | 0.00000 |
| HETATM | 117 | H  | 8.32400  | 4.20800  | 12.46900 | H_  | 1 | 0 | 0.00000 |
| HETATM | 118 | H  | 11.98100 | 4.63100  | 4.80800  | H_  | 1 | 0 | 0.00000 |
| HETATM | 119 | H  | 10.54800 | 4.55500  | 2.98100  | H_  | 1 | 0 | 0.00000 |
| HETATM | 120 | H  | 8.83500  | 2.99000  | 2.89100  | H_  | 1 | 0 | 0.00000 |
| HETATM | 121 | H  | 8.57300  | 1.45300  | 4.60100  | H_  | 1 | 0 | 0.00000 |
| HETATM | 122 | H  | 13.21300 | 4.36900  | 6.33300  | H_  | 1 | 0 | 0.00000 |
| HETATM | 123 | H  | 17.03600 | 3.61700  | 10.32000 | H_  | 1 | 0 | 0.00000 |
| HETATM | 124 | H  | 16.94000 | 5.21800  | 8.62500  | H_  | 1 | 0 | 0.00000 |
| HETATM | 125 | H  | 15.11600 | 5.25100  | 7.20600  | H_  | 1 | 0 | 0.00000 |
| HETATM | 126 | H  | 8.60900  | 0.17000  | 6.14200  | H_  | 1 | 0 | 0.00000 |
| HETATM | 127 | H  | 7.44100  | -1.61400 | 7.02100  | H_  | 1 | 0 | 0.00000 |
| HETATM | 128 | H  | 7.24000  | -3.38600 | 8.48800  | H_  | 1 | 0 | 0.00000 |
| HETATM | 129 | H  | 8.88000  | -3.77300 | 10.09200 | H_  | 1 | 0 | 0.00000 |
| HETATM | 130 | H  | 14.26000 | 2.83500  | 12.47500 | H_  | 1 | 0 | 0.00000 |
| HETATM | 131 | H  | 14.25200 | 1.27600  | 12.83500 | H_  | 1 | 0 | 0.00000 |
| HETATM | 132 | H  | 13.34800 | 1.82300  | 11.63800 | H_  | 1 | 0 | 0.00000 |
| HETATM | 133 | H  | 16.74900 | 2.72300  | 12.27900 | H_  | 1 | 0 | 0.00000 |
| HETATM | 134 | H  | 17.43200 | 1.67300  | 11.28300 | H_  | 1 | 0 | 0.00000 |
| HETATM | 135 | H  | 16.70600 | 1.15600  | 12.61200 | H_  | 1 | 0 | 0.00000 |
| HETATM | 136 | H  | 15.33700 | -0.37900 | 11.29900 | H_  | 1 | 0 | 0.00000 |
| HETATM | 137 | H  | 16.07000 | 0.11600  | 9.96500  | H_  | 1 | 0 | 0.00000 |
| HETATM | 138 | H  | 14.47300 | 0.14300  | 10.06000 | H_  | 1 | 0 | 0.00000 |
| HETATM | 139 | H  | 10.79900 | -4.45600 | 10.99200 | H_  | 1 | 0 | 0.00000 |
| HETATM | 140 | H  | 9.93000  | -3.60500 | 12.03500 | H_  | 1 | 0 | 0.00000 |
| HETATM | 141 | H  | 11.49700 | -3.81400 | 12.28400 | H_  | 1 | 0 | 0.00000 |
| HETATM | 142 | H  | 11.73200 | -1.37700 | 12.49100 | H_  | 1 | 0 | 0.00000 |
| HETATM | 143 | H  | 10.18000 | -1.15300 | 12.17300 | H_  | 1 | 0 | 0.00000 |
| HETATM | 144 | H  | 11.29100 | -0.40700 | 11.29900 | H_  | 1 | 0 | 0.00000 |
| HETATM | 145 | H  | 12.51000 | -3.36100 | 9.62100  | H_  | 1 | 0 | 0.00000 |
| HETATM | 146 | H  | 13.14700 | -2.70700 | 10.93900 | H_  | 1 | 0 | 0.00000 |
| HETATM | 147 | H  | 12.73100 | -1.77800 | 9.70000  | H_  | 1 | 0 | 0.00000 |
| HETATM | 148 | Zn | 13.76600 | 9.15700  | 8.34700  | Zn  | 1 | 0 | 0.00000 |
| HETATM | 149 | O  | 12.64900 | 10.46400 | 9.31100  | O_3 | 2 | 0 | 0.00000 |
| HETATM | 150 | O  | 15.49400 | 9.85000  | 8.95800  | O_3 | 2 | 0 | 0.00000 |
| HETATM | 151 | N  | 13.50300 | 7.59600  | 9.74900  | N_R | 2 | 0 | 0.00000 |
| HETATM | 152 | N  | 12.26000 | 8.91200  | 6.94700  | N_2 | 3 | 0 | 0.00000 |
| HETATM | 153 | N  | 14.80900 | 8.17900  | 6.80300  | N_2 | 3 | 0 | 0.00000 |
| HETATM | 154 | C  | 12.05200 | 6.36200  | 11.21400 | C_R | 3 | 0 | 0.00000 |
| HETATM | 155 | C  | 12.28000 | 7.27600  | 10.20000 | C_R | 3 | 0 | 0.00000 |

|        |     |   |          |          |          |     |   |   |         |
|--------|-----|---|----------|----------|----------|-----|---|---|---------|
| HETATM | 156 | C | 14.55300 | 6.99300  | 10.31300 | C_R | 3 | 0 | 0.00000 |
| HETATM | 157 | C | 14.42500 | 6.05100  | 11.32200 | C_R | 3 | 0 | 0.00000 |
| HETATM | 158 | C | 13.16800 | 5.74200  | 11.77200 | C_R | 3 | 0 | 0.00000 |
| HETATM | 159 | C | 12.63500 | 8.13800  | 5.81400  | C_R | 3 | 0 | 0.00000 |
| HETATM | 160 | C | 11.77600 | 7.79500  | 4.77400  | C_R | 3 | 0 | 0.00000 |
| HETATM | 161 | C | 12.23800 | 7.07400  | 3.69100  | C_R | 3 | 0 | 0.00000 |
| HETATM | 162 | C | 13.55100 | 6.66400  | 3.63500  | C_R | 3 | 0 | 0.00000 |
| HETATM | 163 | C | 14.41400 | 6.98400  | 4.64600  | C_R | 3 | 0 | 0.00000 |
| HETATM | 164 | C | 13.98200 | 7.72800  | 5.74400  | C_R | 3 | 0 | 0.00000 |
| HETATM | 165 | C | 11.09000 | 9.46600  | 7.02900  | C_3 | 4 | 0 | 0.00000 |
| HETATM | 166 | C | 10.62100 | 10.36300 | 8.05600  | C_R | 3 | 0 | 0.00000 |
| HETATM | 167 | C | 11.42800 | 10.86100 | 9.11600  | C_R | 3 | 0 | 0.00000 |
| HETATM | 168 | C | 10.87200 | 11.87100 | 9.98300  | C_R | 3 | 0 | 0.00000 |
| HETATM | 169 | C | 9.57900  | 12.27600 | 9.75200  | C_R | 3 | 0 | 0.00000 |
| HETATM | 170 | C | 8.77000  | 11.76100 | 8.73400  | C_R | 3 | 0 | 0.00000 |
| HETATM | 171 | C | 9.29500  | 10.82000 | 7.90300  | C_R | 3 | 0 | 0.00000 |
| HETATM | 172 | C | 16.07000 | 7.92500  | 6.83300  | C_3 | 4 | 0 | 0.00000 |
| HETATM | 173 | C | 17.00800 | 8.40000  | 7.80600  | C_R | 3 | 0 | 0.00000 |
| HETATM | 174 | C | 18.33100 | 7.88900  | 7.69100  | C_R | 3 | 0 | 0.00000 |
| HETATM | 175 | C | 19.29600 | 8.31700  | 8.54900  | C_R | 3 | 0 | 0.00000 |
| HETATM | 176 | C | 18.99300 | 9.27700  | 9.52100  | C_R | 3 | 0 | 0.00000 |
| HETATM | 177 | C | 17.73300 | 9.81200  | 9.69200  | C_R | 3 | 0 | 0.00000 |
| HETATM | 178 | C | 16.69000 | 9.36500  | 8.81200  | C_R | 3 | 0 | 0.00000 |
| HETATM | 179 | C | 11.71500 | 12.45700 | 11.12500 | C_3 | 4 | 0 | 0.00000 |
| HETATM | 180 | C | 12.09300 | 11.33300 | 12.10700 | C_3 | 4 | 0 | 0.00000 |
| HETATM | 181 | C | 10.94400 | 13.53600 | 11.89500 | C_3 | 4 | 0 | 0.00000 |
| HETATM | 182 | C | 12.98300 | 13.12400 | 10.56100 | C_3 | 4 | 0 | 0.00000 |
| HETATM | 183 | C | 17.40400 | 10.82200 | 10.81000 | C_3 | 4 | 0 | 0.00000 |
| HETATM | 184 | C | 18.65400 | 11.20100 | 11.60100 | C_3 | 4 | 0 | 0.00000 |
| HETATM | 185 | C | 16.39300 | 10.20500 | 11.78100 | C_3 | 4 | 0 | 0.00000 |
| HETATM | 186 | C | 16.85000 | 12.11400 | 10.21500 | C_3 | 4 | 0 | 0.00000 |
| HETATM | 187 | H | 11.53000 | 7.70100  | 9.80100  | H_  | 1 | 0 | 0.00000 |
| HETATM | 188 | H | 15.42500 | 7.22000  | 10.01300 | H_  | 1 | 0 | 0.00000 |
| HETATM | 189 | H | 15.18800 | 5.62900  | 11.69100 | H_  | 1 | 0 | 0.00000 |
| HETATM | 190 | H | 13.05800 | 5.10500  | 12.46900 | H_  | 1 | 0 | 0.00000 |
| HETATM | 191 | H | 10.86300 | 8.06100  | 4.80800  | H_  | 1 | 0 | 0.00000 |
| HETATM | 192 | H | 11.64500 | 6.85700  | 2.98100  | H_  | 1 | 0 | 0.00000 |
| HETATM | 193 | H | 13.85700 | 6.15600  | 2.89100  | H_  | 1 | 0 | 0.00000 |
| HETATM | 194 | H | 15.32000 | 6.69800  | 4.60100  | H_  | 1 | 0 | 0.00000 |
| HETATM | 195 | H | 10.47400 | 9.25900  | 6.33300  | H_  | 1 | 0 | 0.00000 |
| HETATM | 196 | H | 9.21400  | 12.94500 | 10.32000 | H_  | 1 | 0 | 0.00000 |
| HETATM | 197 | H | 7.87500  | 12.06100 | 8.62500  | H_  | 1 | 0 | 0.00000 |
| HETATM | 198 | H | 8.75900  | 10.46600 | 7.20600  | H_  | 1 | 0 | 0.00000 |
| HETATM | 199 | H | 16.41300 | 7.37000  | 6.14200  | H_  | 1 | 0 | 0.00000 |
| HETATM | 200 | H | 18.54100 | 7.25100  | 7.02100  | H_  | 1 | 0 | 0.00000 |
| HETATM | 201 | H | 20.17700 | 7.96300  | 8.48800  | H_  | 1 | 0 | 0.00000 |
| HETATM | 202 | H | 19.69200 | 9.57700  | 10.09200 | H_  | 1 | 0 | 0.00000 |
| HETATM | 203 | H | 11.27900 | 10.93200 | 12.47500 | H_  | 1 | 0 | 0.00000 |
| HETATM | 204 | H | 12.63300 | 11.70500 | 12.83500 | H_  | 1 | 0 | 0.00000 |
| HETATM | 205 | H | 12.61100 | 10.64800 | 11.63800 | H_  | 1 | 0 | 0.00000 |

|        |       |          |          |          |    |   |   |         |
|--------|-------|----------|----------|----------|----|---|---|---------|
| HETATM | 206 H | 10.13200 | 13.14300 | 12.27900 | H_ | 1 | 0 | 0.00000 |
| HETATM | 207 H | 10.69900 | 14.26000 | 11.28300 | H_ | 1 | 0 | 0.00000 |
| HETATM | 208 H | 11.51000 | 13.89000 | 12.61200 | H_ | 1 | 0 | 0.00000 |
| HETATM | 209 H | 13.52400 | 13.47200 | 11.29900 | H_ | 1 | 0 | 0.00000 |
| HETATM | 210 H | 12.72900 | 13.85900 | 9.96500  | H_ | 1 | 0 | 0.00000 |
| HETATM | 211 H | 13.50400 | 12.46200 | 10.06000 | H_ | 1 | 0 | 0.00000 |
| HETATM | 212 H | 19.32400 | 11.58000 | 10.99200 | H_ | 1 | 0 | 0.00000 |
| HETATM | 213 H | 19.02100 | 10.40200 | 12.03500 | H_ | 1 | 0 | 0.00000 |
| HETATM | 214 H | 18.41900 | 11.86400 | 12.28400 | H_ | 1 | 0 | 0.00000 |
| HETATM | 215 H | 16.19100 | 10.84900 | 12.49100 | H_ | 1 | 0 | 0.00000 |
| HETATM | 216 H | 16.77300 | 9.39200  | 12.17300 | H_ | 1 | 0 | 0.00000 |
| HETATM | 217 H | 15.57100 | 9.98100  | 11.29900 | H_ | 1 | 0 | 0.00000 |
| HETATM | 218 H | 17.52000 | 12.51500 | 9.62100  | H_ | 1 | 0 | 0.00000 |
| HETATM | 219 H | 16.63500 | 12.73900 | 10.93900 | H_ | 1 | 0 | 0.00000 |
| HETATM | 220 H | 16.03800 | 11.91500 | 9.70000  | H_ | 1 | 0 | 0.00000 |

**3g-in:**

|        |      |          |          |          |    |   |   |         |
|--------|------|----------|----------|----------|----|---|---|---------|
| HETATM | 1 Ru | 45.44168 | 42.34286 | 40.23485 | Ru | 0 | 0 | 0.00000 |
| HETATM | 2 P  | 40.04673 | 40.05181 | 40.35298 | P  | 0 | 0 | 0.00000 |
| HETATM | 3 O  | 45.43582 | 40.50899 | 40.49448 | O  | 0 | 0 | 0.00000 |
| HETATM | 4 O  | 45.98673 | 42.31303 | 38.43221 | O  | 0 | 0 | 0.00000 |
| HETATM | 5 N  | 43.45075 | 42.11299 | 39.45126 | N  | 0 | 0 | 0.00000 |
| HETATM | 6 N  | 44.42106 | 42.68701 | 42.11695 | N  | 0 | 0 | 0.00000 |
| HETATM | 7 N  | 45.28006 | 44.50977 | 40.09198 | N  | 0 | 0 | 0.00000 |
| HETATM | 8 C  | 41.26329 | 41.12302 | 39.47363 | C  | 0 | 0 | 0.00000 |
| HETATM | 9 C  | 40.81728 | 41.95423 | 38.40030 | C  | 0 | 0 | 0.00000 |
| HETATM | 10 C | 41.77484 | 42.84721 | 37.85917 | C  | 0 | 0 | 0.00000 |
| HETATM | 11 C | 43.06226 | 42.88100 | 38.42172 | C  | 0 | 0 | 0.00000 |
| HETATM | 12 C | 42.57898 | 41.24703 | 39.95587 | C  | 0 | 0 | 0.00000 |
| HETATM | 13 C | 44.13179 | 44.09842 | 42.26829 | C  | 0 | 0 | 0.00000 |
| HETATM | 14 C | 44.55485 | 45.02440 | 41.22957 | C  | 0 | 0 | 0.00000 |
| HETATM | 15 C | 44.28400 | 46.41634 | 41.40752 | C  | 0 | 0 | 0.00000 |
| HETATM | 16 C | 43.62822 | 46.91907 | 42.55292 | C  | 0 | 0 | 0.00000 |
| HETATM | 17 C | 43.20289 | 46.01128 | 43.56636 | C  | 0 | 0 | 0.00000 |
| HETATM | 18 C | 43.45362 | 44.63022 | 43.40692 | C  | 0 | 0 | 0.00000 |
| HETATM | 19 C | 44.12503 | 41.79252 | 42.96440 | C  | 0 | 0 | 0.00000 |
| HETATM | 20 C | 44.40484 | 40.38388 | 42.79321 | C  | 0 | 0 | 0.00000 |
| HETATM | 21 C | 43.97566 | 39.56245 | 43.88374 | C  | 0 | 0 | 0.00000 |
| HETATM | 22 C | 44.15916 | 38.17288 | 43.81893 | C  | 0 | 0 | 0.00000 |
| HETATM | 23 C | 44.79928 | 37.59158 | 42.69910 | C  | 0 | 0 | 0.00000 |
| HETATM | 24 C | 45.25330 | 38.38138 | 41.61261 | C  | 0 | 0 | 0.00000 |
| HETATM | 25 C | 45.04156 | 39.81281 | 41.61658 | C  | 0 | 0 | 0.00000 |
| HETATM | 26 C | 45.81929 | 45.21873 | 39.18923 | C  | 0 | 0 | 0.00000 |
| HETATM | 27 C | 46.62849 | 44.68713 | 38.11603 | C  | 0 | 0 | 0.00000 |
| HETATM | 28 C | 46.75952 | 43.26280 | 37.81270 | C  | 0 | 0 | 0.00000 |
| HETATM | 29 C | 47.71985 | 42.90965 | 36.78814 | C  | 0 | 0 | 0.00000 |
| HETATM | 30 C | 48.40152 | 43.91766 | 36.06173 | C  | 0 | 0 | 0.00000 |
| HETATM | 31 C | 48.20902 | 45.29258 | 36.33968 | C  | 0 | 0 | 0.00000 |
| HETATM | 32 C | 47.34408 | 45.68261 | 37.37375 | C  | 0 | 0 | 0.00000 |
| HETATM | 33 C | 45.97087 | 37.71803 | 40.48356 | C  | 0 | 0 | 0.00000 |

|        |    |    |          |          |          |    |     |         |
|--------|----|----|----------|----------|----------|----|-----|---------|
| HETATM | 34 | C  | 47.41223 | 38.25681 | 40.43522 | C  | 0 0 | 0.00000 |
| HETATM | 35 | C  | 45.29071 | 38.01092 | 39.13577 | C  | 0 0 | 0.00000 |
| HETATM | 36 | C  | 46.02106 | 36.19131 | 40.65049 | C  | 0 0 | 0.00000 |
| HETATM | 37 | C  | 48.03394 | 41.48713 | 36.46948 | C  | 0 0 | 0.00000 |
| HETATM | 38 | C  | 49.03620 | 41.35375 | 35.31162 | C  | 0 0 | 0.00000 |
| HETATM | 39 | C  | 48.64197 | 40.82390 | 37.71896 | C  | 0 0 | 0.00000 |
| HETATM | 40 | C  | 46.76366 | 40.71542 | 36.07228 | C  | 0 0 | 0.00000 |
| HETATM | 41 | H  | 39.78077 | 41.90328 | 38.00859 | H  | 0 0 | 0.00000 |
| HETATM | 42 | H  | 41.50758 | 43.51954 | 37.01247 | H  | 0 0 | 0.00000 |
| HETATM | 43 | H  | 43.85727 | 43.57521 | 38.02355 | H  | 0 0 | 0.00000 |
| HETATM | 44 | H  | 42.96449 | 40.61543 | 40.79996 | H  | 0 0 | 0.00000 |
| HETATM | 45 | H  | 44.59916 | 47.14803 | 40.63508 | H  | 0 0 | 0.00000 |
| HETATM | 46 | H  | 43.44717 | 48.00940 | 42.66265 | H  | 0 0 | 0.00000 |
| HETATM | 47 | H  | 42.68173 | 46.38597 | 44.47238 | H  | 0 0 | 0.00000 |
| HETATM | 48 | H  | 43.10489 | 43.95284 | 44.21408 | H  | 0 0 | 0.00000 |
| HETATM | 49 | H  | 43.61517 | 42.15622 | 43.89285 | H  | 0 0 | 0.00000 |
| HETATM | 50 | H  | 43.49567 | 40.01440 | 44.77430 | H  | 0 0 | 0.00000 |
| HETATM | 51 | H  | 43.81115 | 37.52683 | 44.65519 | H  | 0 0 | 0.00000 |
| HETATM | 52 | H  | 44.94599 | 36.49426 | 42.68956 | H  | 0 0 | 0.00000 |
| HETATM | 53 | H  | 45.69665 | 46.32430 | 39.30707 | H  | 0 0 | 0.00000 |
| HETATM | 54 | H  | 49.11024 | 43.64282 | 35.25594 | H  | 0 0 | 0.00000 |
| HETATM | 55 | H  | 48.75676 | 46.06175 | 35.75190 | H  | 0 0 | 0.00000 |
| HETATM | 56 | H  | 47.22707 | 46.75691 | 37.61483 | H  | 0 0 | 0.00000 |
| HETATM | 57 | H  | 47.41329 | 39.37893 | 40.35508 | H  | 0 0 | 0.00000 |
| HETATM | 58 | H  | 47.98649 | 37.84643 | 39.56155 | H  | 0 0 | 0.00000 |
| HETATM | 59 | H  | 47.97963 | 37.98883 | 41.36729 | H  | 0 0 | 0.00000 |
| HETATM | 60 | H  | 45.39728 | 39.09270 | 38.84268 | H  | 0 0 | 0.00000 |
| HETATM | 61 | H  | 44.19126 | 37.78296 | 39.18017 | H  | 0 0 | 0.00000 |
| HETATM | 62 | H  | 45.73348 | 37.39647 | 38.30635 | H  | 0 0 | 0.00000 |
| HETATM | 63 | H  | 46.48628 | 35.69266 | 39.75817 | H  | 0 0 | 0.00000 |
| HETATM | 64 | H  | 44.98957 | 35.75989 | 40.77402 | H  | 0 0 | 0.00000 |
| HETATM | 65 | H  | 46.62491 | 35.89478 | 41.55112 | H  | 0 0 | 0.00000 |
| HETATM | 66 | H  | 48.63288 | 41.81097 | 34.36726 | H  | 0 0 | 0.00000 |
| HETATM | 67 | H  | 49.26846 | 40.27841 | 35.08761 | H  | 0 0 | 0.00000 |
| HETATM | 68 | H  | 50.01012 | 41.86232 | 35.54839 | H  | 0 0 | 0.00000 |
| HETATM | 69 | H  | 49.61491 | 41.30875 | 38.00263 | H  | 0 0 | 0.00000 |
| HETATM | 70 | H  | 48.84610 | 39.73220 | 37.55302 | H  | 0 0 | 0.00000 |
| HETATM | 71 | H  | 47.94621 | 40.92138 | 38.60070 | H  | 0 0 | 0.00000 |
| HETATM | 72 | H  | 46.02784 | 40.67340 | 36.92143 | H  | 0 0 | 0.00000 |
| HETATM | 73 | H  | 46.99921 | 39.65857 | 35.77484 | H  | 0 0 | 0.00000 |
| HETATM | 74 | H  | 46.24662 | 41.20638 | 35.20458 | H  | 0 0 | 0.00000 |
| HETATM | 75 | Ru | 35.23697 | 43.55128 | 40.23544 | Ru | 0 0 | 0.00000 |
| HETATM | 76 | O  | 36.83927 | 44.45296 | 40.49458 | O  | 0 0 | 0.00000 |
| HETATM | 77 | O  | 35.00013 | 44.03179 | 38.43773 | O  | 0 0 | 0.00000 |
| HETATM | 78 | N  | 36.41852 | 41.94445 | 39.44475 | N  | 0 0 | 0.00000 |
| HETATM | 79 | N  | 35.46001 | 42.48818 | 42.11756 | N  | 0 0 | 0.00000 |
| HETATM | 80 | N  | 33.45322 | 42.32129 | 40.09335 | N  | 0 0 | 0.00000 |
| HETATM | 81 | C  | 38.38791 | 40.55971 | 39.45929 | C  | 0 0 | 0.00000 |
| HETATM | 82 | C  | 37.90324 | 39.74651 | 38.40532 | C  | 0 0 | 0.00000 |
| HETATM | 83 | C  | 36.63143 | 40.12121 | 37.85601 | C  | 0 0 | 0.00000 |

|        |     |   |          |          |          |   |     |         |
|--------|-----|---|----------|----------|----------|---|-----|---------|
| HETATM | 84  | C | 35.95450 | 41.21325 | 38.40763 | C | 0 0 | 0.00000 |
| HETATM | 85  | C | 37.63876 | 41.61554 | 39.95356 | C | 0 0 | 0.00000 |
| HETATM | 86  | C | 34.38374 | 41.53050 | 42.26822 | C | 0 0 | 0.00000 |
| HETATM | 87  | C | 33.37083 | 41.43377 | 41.23054 | C | 0 0 | 0.00000 |
| HETATM | 88  | C | 32.30147 | 40.50240 | 41.40750 | C | 0 0 | 0.00000 |
| HETATM | 89  | C | 32.19374 | 39.68261 | 42.55295 | C | 0 0 | 0.00000 |
| HETATM | 90  | C | 33.19255 | 39.76840 | 43.56620 | C | 0 0 | 0.00000 |
| HETATM | 91  | C | 34.26324 | 40.67667 | 43.40644 | C | 0 0 | 0.00000 |
| HETATM | 92  | C | 36.38409 | 42.67658 | 42.96306 | C | 0 0 | 0.00000 |
| HETATM | 93  | C | 37.46412 | 43.62365 | 42.79331 | C | 0 0 | 0.00000 |
| HETATM | 94  | C | 38.39036 | 43.66201 | 43.88352 | C | 0 0 | 0.00000 |
| HETATM | 95  | C | 39.50269 | 44.51597 | 43.81853 | C | 0 0 | 0.00000 |
| HETATM | 96  | C | 39.68596 | 45.36087 | 42.69886 | C | 0 0 | 0.00000 |
| HETATM | 97  | C | 38.77493 | 45.35931 | 41.61270 | C | 0 0 | 0.00000 |
| HETATM | 98  | C | 37.64015 | 44.46067 | 41.61630 | C | 0 0 | 0.00000 |
| HETATM | 99  | C | 32.57100 | 42.43100 | 39.18943 | C | 0 0 | 0.00000 |
| HETATM | 100 | C | 32.62480 | 43.39730 | 38.11646 | C | 0 0 | 0.00000 |
| HETATM | 101 | C | 33.79280 | 44.22417 | 37.81407 | C | 0 0 | 0.00000 |
| HETATM | 102 | C | 33.62022 | 45.23099 | 36.78860 | C | 0 0 | 0.00000 |
| HETATM | 103 | C | 32.40623 | 45.31724 | 36.06146 | C | 0 0 | 0.00000 |
| HETATM | 104 | C | 31.31199 | 44.46312 | 36.33967 | C | 0 0 | 0.00000 |
| HETATM | 105 | C | 31.40594 | 43.51917 | 37.37330 | C | 0 0 | 0.00000 |
| HETATM | 106 | C | 38.99073 | 46.31196 | 40.48360 | C | 0 0 | 0.00000 |
| HETATM | 107 | C | 37.80344 | 47.29093 | 40.43506 | C | 0 0 | 0.00000 |
| HETATM | 108 | C | 39.07715 | 45.57655 | 39.13568 | C | 0 0 | 0.00000 |
| HETATM | 109 | C | 40.28780 | 47.11898 | 40.65041 | C | 0 0 | 0.00000 |
| HETATM | 110 | C | 34.69509 | 46.21396 | 36.46962 | C | 0 0 | 0.00000 |
| HETATM | 111 | C | 34.30973 | 47.14852 | 35.31191 | C | 0 0 | 0.00000 |
| HETATM | 112 | C | 34.96555 | 47.07212 | 37.71882 | C | 0 0 | 0.00000 |
| HETATM | 113 | C | 35.99846 | 45.50002 | 36.07243 | C | 0 0 | 0.00000 |
| HETATM | 114 | H | 38.47298 | 38.87014 | 38.02387 | H | 0 0 | 0.00000 |
| HETATM | 115 | H | 36.18733 | 39.54775 | 37.00998 | H | 0 0 | 0.00000 |
| HETATM | 116 | H | 34.95521 | 41.54904 | 38.00453 | H | 0 0 | 0.00000 |
| HETATM | 117 | H | 38.00098 | 42.26117 | 40.80047 | H | 0 0 | 0.00000 |
| HETATM | 118 | H | 31.50999 | 40.40900 | 40.63534 | H | 0 0 | 0.00000 |
| HETATM | 119 | H | 31.34011 | 38.98051 | 42.66279 | H | 0 0 | 0.00000 |
| HETATM | 120 | H | 33.12887 | 39.12956 | 44.47239 | H | 0 0 | 0.00000 |
| HETATM | 121 | H | 35.02404 | 40.71269 | 44.21397 | H | 0 0 | 0.00000 |
| HETATM | 122 | H | 36.32534 | 42.05111 | 43.89006 | H | 0 0 | 0.00000 |
| HETATM | 123 | H | 38.23950 | 43.02035 | 44.77429 | H | 0 0 | 0.00000 |
| HETATM | 124 | H | 40.23631 | 44.53728 | 44.65504 | H | 0 0 | 0.00000 |
| HETATM | 125 | H | 40.56336 | 46.03631 | 42.68937 | H | 0 0 | 0.00000 |
| HETATM | 126 | H | 31.67574 | 41.76966 | 39.30614 | H | 0 0 | 0.00000 |
| HETATM | 127 | H | 32.28997 | 46.06810 | 35.25550 | H | 0 0 | 0.00000 |
| HETATM | 128 | H | 30.37179 | 44.55303 | 35.75180 | H | 0 0 | 0.00000 |
| HETATM | 129 | H | 30.53435 | 42.88085 | 37.61477 | H | 0 0 | 0.00000 |
| HETATM | 130 | H | 36.83117 | 46.73078 | 40.35493 | H | 0 0 | 0.00000 |
| HETATM | 131 | H | 37.87166 | 47.99351 | 39.56141 | H | 0 0 | 0.00000 |
| HETATM | 132 | H | 37.75176 | 47.91630 | 41.36709 | H | 0 0 | 0.00000 |
| HETATM | 133 | H | 38.08701 | 45.12826 | 38.84229 | H | 0 0 | 0.00000 |

|        |     |    |          |          |          |    |     |         |
|--------|-----|----|----------|----------|----------|----|-----|---------|
| HETATM | 134 | H  | 39.82394 | 44.73816 | 39.18029 | H  | 0 0 | 0.00000 |
| HETATM | 135 | H  | 39.38840 | 46.26703 | 38.30627 | H  | 0 0 | 0.00000 |
| HETATM | 136 | H  | 40.48706 | 47.77135 | 39.75814 | H  | 0 0 | 0.00000 |
| HETATM | 137 | H  | 41.17718 | 46.44147 | 40.77394 | H  | 0 0 | 0.00000 |
| HETATM | 138 | H  | 40.24265 | 47.79009 | 41.55111 | H  | 0 0 | 0.00000 |
| HETATM | 139 | H  | 34.11547 | 46.57080 | 34.36731 | H  | 0 0 | 0.00000 |
| HETATM | 140 | H  | 35.12456 | 47.88765 | 35.08760 | H  | 0 0 | 0.00000 |
| HETATM | 141 | H  | 33.38215 | 47.73772 | 35.54838 | H  | 0 0 | 0.00000 |
| HETATM | 142 | H  | 34.05913 | 47.67227 | 38.00269 | H  | 0 0 | 0.00000 |
| HETATM | 143 | H  | 35.80868 | 47.79527 | 37.55294 | H  | 0 0 | 0.00000 |
| HETATM | 144 | H  | 35.22940 | 46.42084 | 38.60077 | H  | 0 0 | 0.00000 |
| HETATM | 145 | H  | 36.40297 | 44.88364 | 36.92138 | H  | 0 0 | 0.00000 |
| HETATM | 146 | H  | 36.79621 | 46.23236 | 35.77494 | H  | 0 0 | 0.00000 |
| HETATM | 147 | H  | 35.83212 | 44.80690 | 35.20449 | H  | 0 0 | 0.00000 |
| HETATM | 148 | Ru | 39.30714 | 34.10232 | 40.23422 | Ru | 0 0 | 0.00000 |
| HETATM | 149 | O  | 37.72415 | 35.03626 | 40.49407 | O  | 0 0 | 0.00000 |
| HETATM | 150 | O  | 39.00800 | 33.65406 | 38.43860 | O  | 0 0 | 0.00000 |
| HETATM | 151 | N  | 40.10951 | 35.92763 | 39.44089 | N  | 0 0 | 0.00000 |
| HETATM | 152 | N  | 40.11479 | 34.82439 | 42.11673 | N  | 0 0 | 0.00000 |
| HETATM | 153 | N  | 41.26284 | 33.16920 | 40.09325 | N  | 0 0 | 0.00000 |
| HETATM | 154 | C  | 40.36162 | 38.32678 | 39.47618 | C  | 0 0 | 0.00000 |
| HETATM | 155 | C  | 41.28302 | 38.30513 | 38.40495 | C  | 0 0 | 0.00000 |
| HETATM | 156 | C  | 41.58233 | 37.01453 | 37.85156 | C  | 0 0 | 0.00000 |
| HETATM | 157 | C  | 40.97435 | 35.88429 | 38.40447 | C  | 0 0 | 0.00000 |
| HETATM | 158 | C  | 39.79811 | 37.15458 | 39.95181 | C  | 0 0 | 0.00000 |
| HETATM | 159 | C  | 41.48217 | 34.37079 | 42.26857 | C  | 0 0 | 0.00000 |
| HETATM | 160 | C  | 42.07273 | 33.54165 | 41.23141 | C  | 0 0 | 0.00000 |
| HETATM | 161 | C  | 43.41451 | 33.08159 | 41.40773 | C  | 0 0 | 0.00000 |
| HETATM | 162 | C  | 44.17786 | 33.39840 | 42.55305 | C  | 0 0 | 0.00000 |
| HETATM | 163 | C  | 43.60431 | 34.22064 | 43.56612 | C  | 0 0 | 0.00000 |
| HETATM | 164 | C  | 42.28229 | 34.69375 | 43.40604 | C  | 0 0 | 0.00000 |
| HETATM | 165 | C  | 39.49028 | 35.52999 | 42.96288 | C  | 0 0 | 0.00000 |
| HETATM | 166 | C  | 38.12975 | 35.99179 | 42.79269 | C  | 0 0 | 0.00000 |
| HETATM | 167 | C  | 37.63351 | 36.77527 | 43.88365 | C  | 0 0 | 0.00000 |
| HETATM | 168 | C  | 36.33840 | 37.31118 | 43.81855 | C  | 0 0 | 0.00000 |
| HETATM | 169 | C  | 35.51451 | 37.04739 | 42.69862 | C  | 0 0 | 0.00000 |
| HETATM | 170 | C  | 35.97155 | 36.25908 | 41.61262 | C  | 0 0 | 0.00000 |
| HETATM | 171 | C  | 37.31710 | 35.72550 | 41.61491 | C  | 0 0 | 0.00000 |
| HETATM | 172 | C  | 41.60843 | 32.35027 | 39.18879 | C  | 0 0 | 0.00000 |
| HETATM | 173 | C  | 40.74447 | 31.91404 | 38.11624 | C  | 0 0 | 0.00000 |
| HETATM | 174 | C  | 39.44546 | 32.51127 | 37.81455 | C  | 0 0 | 0.00000 |
| HETATM | 175 | C  | 38.65973 | 31.85869 | 36.78835 | C  | 0 0 | 0.00000 |
| HETATM | 176 | C  | 39.19238 | 30.76448 | 36.06135 | C  | 0 0 | 0.00000 |
| HETATM | 177 | C  | 40.47886 | 30.24411 | 36.33925 | C  | 0 0 | 0.00000 |
| HETATM | 178 | C  | 41.24892 | 30.79816 | 37.37334 | C  | 0 0 | 0.00000 |
| HETATM | 179 | C  | 35.03840 | 35.96994 | 40.48374 | C  | 0 0 | 0.00000 |
| HETATM | 180 | C  | 34.78414 | 34.45229 | 40.43518 | C  | 0 0 | 0.00000 |
| HETATM | 181 | C  | 35.63215 | 36.41238 | 39.13586 | C  | 0 0 | 0.00000 |
| HETATM | 182 | C  | 33.69106 | 36.68976 | 40.65045 | C  | 0 0 | 0.00000 |
| HETATM | 183 | C  | 37.27100 | 32.29885 | 36.46971 | C  | 0 0 | 0.00000 |

|        |     |   |          |          |          |   |     |         |
|--------|-----|---|----------|----------|----------|---|-----|---------|
| HETATM | 184 | C | 36.65423 | 31.49797 | 35.31179 | C | 0 0 | 0.00000 |
| HETATM | 185 | C | 36.39260 | 32.10400 | 37.71898 | C | 0 0 | 0.00000 |
| HETATM | 186 | C | 37.23782 | 33.78469 | 36.07260 | C | 0 0 | 0.00000 |
| HETATM | 187 | H | 41.74829 | 39.23849 | 38.02088 | H | 0 0 | 0.00000 |
| HETATM | 188 | H | 42.29631 | 36.91356 | 37.00563 | H | 0 0 | 0.00000 |
| HETATM | 189 | H | 41.18092 | 34.85015 | 38.00118 | H | 0 0 | 0.00000 |
| HETATM | 190 | H | 39.05352 | 37.15248 | 40.79186 | H | 0 0 | 0.00000 |
| HETATM | 191 | H | 43.89093 | 32.44291 | 40.63502 | H | 0 0 | 0.00000 |
| HETATM | 192 | H | 45.21244 | 33.01012 | 42.66268 | H | 0 0 | 0.00000 |
| HETATM | 193 | H | 44.18944 | 34.48491 | 44.47223 | H | 0 0 | 0.00000 |
| HETATM | 194 | H | 41.87080 | 35.33481 | 44.21365 | H | 0 0 | 0.00000 |
| HETATM | 195 | H | 40.06132 | 35.79290 | 43.89020 | H | 0 0 | 0.00000 |
| HETATM | 196 | H | 38.26489 | 36.96541 | 44.77379 | H | 0 0 | 0.00000 |
| HETATM | 197 | H | 35.95274 | 37.93628 | 44.65468 | H | 0 0 | 0.00000 |
| HETATM | 198 | H | 34.49091 | 37.46971 | 42.68886 | H | 0 0 | 0.00000 |
| HETATM | 199 | H | 42.62960 | 31.90610 | 39.30471 | H | 0 0 | 0.00000 |
| HETATM | 200 | H | 38.60007 | 30.28862 | 35.25508 | H | 0 0 | 0.00000 |
| HETATM | 201 | H | 40.87127 | 29.38537 | 35.75193 | H | 0 0 | 0.00000 |
| HETATM | 202 | H | 42.23759 | 30.36237 | 37.61496 | H | 0 0 | 0.00000 |
| HETATM | 203 | H | 35.75536 | 33.89032 | 40.35505 | H | 0 0 | 0.00000 |
| HETATM | 204 | H | 34.14149 | 34.15992 | 39.56165 | H | 0 0 | 0.00000 |
| HETATM | 205 | H | 34.26858 | 34.09484 | 41.36730 | H | 0 0 | 0.00000 |
| HETATM | 206 | H | 36.51565 | 35.77924 | 38.84266 | H | 0 0 | 0.00000 |
| HETATM | 207 | H | 35.98480 | 37.47832 | 39.18037 | H | 0 0 | 0.00000 |
| HETATM | 208 | H | 34.87887 | 36.33654 | 38.30618 | H | 0 0 | 0.00000 |
| HETATM | 209 | H | 33.02630 | 36.53612 | 39.75825 | H | 0 0 | 0.00000 |
| HETATM | 210 | H | 33.83311 | 37.79877 | 40.77389 | H | 0 0 | 0.00000 |
| HETATM | 211 | H | 33.13246 | 36.31534 | 41.55127 | H | 0 0 | 0.00000 |
| HETATM | 212 | H | 37.25181 | 31.61866 | 34.36737 | H | 0 0 | 0.00000 |
| HETATM | 213 | H | 35.60676 | 31.83438 | 35.08767 | H | 0 0 | 0.00000 |
| HETATM | 214 | H | 36.60770 | 30.40017 | 35.54833 | H | 0 0 | 0.00000 |
| HETATM | 215 | H | 36.32623 | 31.01893 | 38.00273 | H | 0 0 | 0.00000 |
| HETATM | 216 | H | 35.34486 | 32.47267 | 37.55298 | H | 0 0 | 0.00000 |
| HETATM | 217 | H | 36.82488 | 32.65804 | 38.60093 | H | 0 0 | 0.00000 |
| HETATM | 218 | H | 37.56943 | 34.44305 | 36.92161 | H | 0 0 | 0.00000 |
| HETATM | 219 | H | 36.20478 | 34.10935 | 35.77506 | H | 0 0 | 0.00000 |
| HETATM | 220 | H | 37.92136 | 33.98715 | 35.20479 | H | 0 0 | 0.00000 |
| HETATM | 221 | C | 47.29069 | 42.60706 | 41.13578 | C | 0 0 | 0.00000 |
| HETATM | 222 | O | 48.31711 | 42.74994 | 41.63072 | O | 0 0 | 0.00000 |
| HETATM | 223 | C | 34.09279 | 45.01244 | 41.13689 | C | 0 0 | 0.00000 |
| HETATM | 224 | O | 33.45733 | 45.83000 | 41.63484 | O | 0 0 | 0.00000 |
| HETATM | 225 | C | 38.61291 | 32.37629 | 41.13690 | C | 0 0 | 0.00000 |
| HETATM | 226 | O | 38.22269 | 31.41714 | 41.63415 | O | 0 0 | 0.00000 |

**3g-out:**

|        |   |    |          |          |          |    |     |         |
|--------|---|----|----------|----------|----------|----|-----|---------|
| HETATM | 1 | Ru | 35.39124 | 41.20560 | 39.49541 | Ru | 0 0 | 0.00000 |
| HETATM | 2 | P  | 39.99574 | 39.99993 | 43.13628 | P  | 0 0 | 0.00000 |
| HETATM | 3 | O  | 35.28108 | 39.82878 | 40.70515 | O  | 0 0 | 0.00000 |
| HETATM | 4 | O  | 34.39855 | 42.41997 | 40.48836 | O  | 0 0 | 0.00000 |
| HETATM | 5 | N  | 36.98691 | 41.77239 | 40.82799 | N  | 0 0 | 0.00000 |



|        |      |          |          |          |   |     |         |
|--------|------|----------|----------|----------|---|-----|---------|
| HETATM | 6 N  | 36.74477 | 40.02657 | 38.26357 | N | 0 0 | 0.00000 |
| HETATM | 7 N  | 36.02465 | 42.79787 | 38.14419 | N | 0 0 | 0.00000 |
| HETATM | 8 C  | 38.83348 | 41.20156 | 42.25175 | C | 0 0 | 0.00000 |
| HETATM | 9 C  | 37.88700 | 40.87667 | 41.28245 | C | 0 0 | 0.00000 |
| HETATM | 10 C | 37.00346 | 43.01069 | 41.37683 | C | 0 0 | 0.00000 |
| HETATM | 11 C | 37.90816 | 43.42656 | 42.36001 | C | 0 0 | 0.00000 |
| HETATM | 12 C | 38.87497 | 42.49415 | 42.84074 | C | 0 0 | 0.00000 |
| HETATM | 13 C | 37.26276 | 40.84070 | 37.19131 | C | 0 0 | 0.00000 |
| HETATM | 14 C | 37.99443 | 40.28438 | 36.09508 | C | 0 0 | 0.00000 |
| HETATM | 15 C | 38.29378 | 41.02404 | 34.93100 | C | 0 0 | 0.00000 |
| HETATM | 16 C | 37.97122 | 42.41249 | 34.88813 | C | 0 0 | 0.00000 |
| HETATM | 17 C | 37.32597 | 43.00445 | 35.99691 | C | 0 0 | 0.00000 |
| HETATM | 18 C | 36.89663 | 42.24614 | 37.12858 | C | 0 0 | 0.00000 |
| HETATM | 19 C | 36.96538 | 38.78784 | 38.41221 | C | 0 0 | 0.00000 |
| HETATM | 20 C | 36.29858 | 37.96294 | 39.39753 | C | 0 0 | 0.00000 |
| HETATM | 21 C | 35.44183 | 38.48247 | 40.44996 | C | 0 0 | 0.00000 |
| HETATM | 22 C | 34.77732 | 37.51063 | 41.28906 | C | 0 0 | 0.00000 |
| HETATM | 23 C | 34.98969 | 36.12246 | 41.08715 | C | 0 0 | 0.00000 |
| HETATM | 24 C | 35.83495 | 35.64178 | 40.06055 | C | 0 0 | 0.00000 |
| HETATM | 25 C | 36.46699 | 36.55610 | 39.20407 | C | 0 0 | 0.00000 |
| HETATM | 26 C | 35.66263 | 44.00981 | 38.18908 | C | 0 0 | 0.00000 |
| HETATM | 27 C | 34.74425 | 44.55214 | 39.16752 | C | 0 0 | 0.00000 |
| HETATM | 28 C | 34.42968 | 45.94179 | 39.01339 | C | 0 0 | 0.00000 |
| HETATM | 29 C | 33.50559 | 46.54640 | 39.87899 | C | 0 0 | 0.00000 |
| HETATM | 30 C | 32.86427 | 45.78208 | 40.88299 | C | 0 0 | 0.00000 |
| HETATM | 31 C | 33.16061 | 44.40687 | 41.05657 | C | 0 0 | 0.00000 |
| HETATM | 32 C | 34.13670 | 43.74681 | 40.21581 | C | 0 0 | 0.00000 |
| HETATM | 33 C | 33.85078 | 37.91859 | 42.38487 | C | 0 0 | 0.00000 |
| HETATM | 34 C | 34.58316 | 38.79948 | 43.41320 | C | 0 0 | 0.00000 |
| HETATM | 35 C | 33.26988 | 36.71808 | 43.14871 | C | 0 0 | 0.00000 |
| HETATM | 36 C | 32.68940 | 38.73026 | 41.78307 | C | 0 0 | 0.00000 |
| HETATM | 37 C | 32.41959 | 43.65196 | 42.11087 | C | 0 0 | 0.00000 |
| HETATM | 38 C | 31.43046 | 44.54498 | 42.87772 | C | 0 0 | 0.00000 |
| HETATM | 39 C | 33.39327 | 43.05017 | 43.13755 | C | 0 0 | 0.00000 |
| HETATM | 40 C | 31.61535 | 42.51894 | 41.44798 | C | 0 0 | 0.00000 |
| HETATM | 41 H | 37.79387 | 39.84120 | 40.85941 | H | 0 0 | 0.00000 |
| HETATM | 42 H | 36.20337 | 43.70784 | 41.00294 | H | 0 0 | 0.00000 |
| HETATM | 43 H | 37.86688 | 44.46282 | 42.76315 | H | 0 0 | 0.00000 |
| HETATM | 44 H | 39.60893 | 42.76391 | 43.62921 | H | 0 0 | 0.00000 |
| HETATM | 45 H | 38.31598 | 39.22387 | 36.11994 | H | 0 0 | 0.00000 |
| HETATM | 46 H | 38.80514 | 40.53812 | 34.07482 | H | 0 0 | 0.00000 |
| HETATM | 47 H | 38.23653 | 43.02663 | 33.99978 | H | 0 0 | 0.00000 |
| HETATM | 48 H | 37.11271 | 44.09360 | 35.93786 | H | 0 0 | 0.00000 |
| HETATM | 49 H | 37.66820 | 38.33092 | 37.66942 | H | 0 0 | 0.00000 |
| HETATM | 50 H | 34.48547 | 35.38365 | 41.73953 | H | 0 0 | 0.00000 |
| HETATM | 51 H | 35.99272 | 34.54877 | 39.92700 | H | 0 0 | 0.00000 |
| HETATM | 52 H | 37.09174 | 36.19075 | 38.37039 | H | 0 0 | 0.00000 |
| HETATM | 53 H | 36.08816 | 44.66759 | 37.38844 | H | 0 0 | 0.00000 |
| HETATM | 54 H | 34.89849 | 46.54097 | 38.20792 | H | 0 0 | 0.00000 |
| HETATM | 55 H | 33.26164 | 47.62497 | 39.76773 | H | 0 0 | 0.00000 |



|        |       |          |          |          |    |     |         |
|--------|-------|----------|----------|----------|----|-----|---------|
| HETATM | 56 H  | 32.11792 | 46.27772 | 41.53402 | H  | 0 0 | 0.00000 |
| HETATM | 57 H  | 35.46148 | 38.26053 | 43.85947 | H  | 0 0 | 0.00000 |
| HETATM | 58 H  | 33.90639 | 39.09993 | 44.25822 | H  | 0 0 | 0.00000 |
| HETATM | 59 H  | 34.97469 | 39.74116 | 42.93987 | H  | 0 0 | 0.00000 |
| HETATM | 60 H  | 34.07938 | 36.09941 | 43.62263 | H  | 0 0 | 0.00000 |
| HETATM | 61 H  | 32.68144 | 36.04085 | 42.47299 | H  | 0 0 | 0.00000 |
| HETATM | 62 H  | 32.58021 | 37.04307 | 43.97283 | H  | 0 0 | 0.00000 |
| HETATM | 63 H  | 31.99704 | 39.12244 | 42.57604 | H  | 0 0 | 0.00000 |
| HETATM | 64 H  | 32.07821 | 38.10360 | 41.07914 | H  | 0 0 | 0.00000 |
| HETATM | 65 H  | 33.07204 | 39.61317 | 41.19419 | H  | 0 0 | 0.00000 |
| HETATM | 66 H  | 30.66216 | 44.99281 | 42.19013 | H  | 0 0 | 0.00000 |
| HETATM | 67 H  | 31.95781 | 45.39235 | 43.39430 | H  | 0 0 | 0.00000 |
| HETATM | 68 H  | 30.87697 | 43.96701 | 43.66599 | H  | 0 0 | 0.00000 |
| HETATM | 69 H  | 32.84685 | 42.52683 | 43.96789 | H  | 0 0 | 0.00000 |
| HETATM | 70 H  | 34.03619 | 43.84498 | 43.60340 | H  | 0 0 | 0.00000 |
| HETATM | 71 H  | 34.08510 | 42.29994 | 42.66322 | H  | 0 0 | 0.00000 |
| HETATM | 72 H  | 30.83436 | 42.92918 | 40.75358 | H  | 0 0 | 0.00000 |
| HETATM | 73 H  | 31.09106 | 41.87854 | 42.20631 | H  | 0 0 | 0.00000 |
| HETATM | 74 H  | 32.27900 | 41.84860 | 40.83416 | H  | 0 0 | 0.00000 |
| HETATM | 75 Ru | 41.26035 | 35.40462 | 39.49611 | Ru | 0 0 | 0.00000 |
| HETATM | 76 O  | 42.50795 | 35.99931 | 40.70653 | O  | 0 0 | 0.00000 |
| HETATM | 77 O  | 40.70489 | 33.93821 | 40.48838 | O  | 0 0 | 0.00000 |
| HETATM | 78 N  | 39.97148 | 36.50415 | 40.82809 | N  | 0 0 | 0.00000 |
| HETATM | 79 N  | 41.60456 | 37.16693 | 38.26496 | N  | 0 0 | 0.00000 |
| HETATM | 80 N  | 39.56557 | 35.15889 | 38.14552 | N  | 0 0 | 0.00000 |
| HETATM | 81 C  | 39.54092 | 38.38938 | 42.25113 | C  | 0 0 | 0.00000 |
| HETATM | 82 C  | 40.29669 | 37.73224 | 41.28273 | C  | 0 0 | 0.00000 |
| HETATM | 83 C  | 38.89100 | 35.89893 | 41.37710 | C  | 0 0 | 0.00000 |
| HETATM | 84 C  | 38.07825 | 36.47433 | 42.36000 | C  | 0 0 | 0.00000 |
| HETATM | 85 C  | 38.40144 | 37.77841 | 42.84056 | C  | 0 0 | 0.00000 |
| HETATM | 86 C  | 40.64071 | 37.20907 | 37.19078 | C  | 0 0 | 0.00000 |
| HETATM | 87 C  | 40.75666 | 38.12058 | 36.09501 | C  | 0 0 | 0.00000 |
| HETATM | 88 C  | 39.96618 | 38.01019 | 34.93079 | C  | 0 0 | 0.00000 |
| HETATM | 89 C  | 38.92513 | 37.03654 | 34.88752 | C  | 0 0 | 0.00000 |
| HETATM | 90 C  | 38.73465 | 36.18167 | 35.99610 | C  | 0 0 | 0.00000 |
| HETATM | 91 C  | 39.60633 | 36.18892 | 37.12852 | C  | 0 0 | 0.00000 |
| HETATM | 92 C  | 42.56800 | 37.97778 | 38.41425 | C  | 0 0 | 0.00000 |
| HETATM | 93 C  | 43.61476 | 37.81235 | 39.39680 | C  | 0 0 | 0.00000 |
| HETATM | 94 C  | 43.59367 | 36.81152 | 40.45011 | C  | 0 0 | 0.00000 |
| HETATM | 95 C  | 44.76713 | 36.72184 | 41.28846 | C  | 0 0 | 0.00000 |
| HETATM | 96 C  | 45.86299 | 37.59953 | 41.08654 | C  | 0 0 | 0.00000 |
| HETATM | 97 C  | 45.85567 | 38.57165 | 40.05937 | C  | 0 0 | 0.00000 |
| HETATM | 98 C  | 44.74865 | 38.66188 | 39.20336 | C  | 0 0 | 0.00000 |
| HETATM | 99 C  | 38.69611 | 34.24013 | 38.18921 | C  | 0 0 | 0.00000 |
| HETATM | 100 C | 38.68587 | 33.17289 | 39.16778 | C  | 0 0 | 0.00000 |
| HETATM | 101 C | 37.63990 | 32.20581 | 39.01294 | C  | 0 0 | 0.00000 |
| HETATM | 102 C | 37.57784 | 31.10221 | 39.87849 | C  | 0 0 | 0.00000 |
| HETATM | 103 C | 38.56036 | 30.92926 | 40.88246 | C  | 0 0 | 0.00000 |
| HETATM | 104 C | 39.60318 | 31.87283 | 41.05678 | C  | 0 0 | 0.00000 |
| HETATM | 105 C | 39.68739 | 33.04874 | 40.21646 | C  | 0 0 | 0.00000 |

|        |     |    |          |          |          |    |     |         |
|--------|-----|----|----------|----------|----------|----|-----|---------|
| HETATM | 106 | C  | 44.87712 | 35.71451 | 42.38543 | C  | 0 0 | 0.00000 |
| HETATM | 107 | C  | 43.74816 | 35.90910 | 43.41331 | C  | 0 0 | 0.00000 |
| HETATM | 108 | C  | 46.20730 | 35.81259 | 43.14864 | C  | 0 0 | 0.00000 |
| HETATM | 109 | C  | 44.75482 | 34.30356 | 41.78304 | C  | 0 0 | 0.00000 |
| HETATM | 110 | C  | 40.62773 | 31.60923 | 42.11092 | C  | 0 0 | 0.00000 |
| HETATM | 111 | C  | 40.34844 | 30.30598 | 42.87750 | C  | 0 0 | 0.00000 |
| HETATM | 112 | C  | 40.66211 | 32.75326 | 43.13760 | C  | 0 0 | 0.00000 |
| HETATM | 113 | C  | 42.01092 | 31.47888 | 41.44790 | C  | 0 0 | 0.00000 |
| HETATM | 114 | H  | 41.23998 | 38.16989 | 40.85975 | H  | 0 0 | 0.00000 |
| HETATM | 115 | H  | 38.68777 | 34.85722 | 41.00327 | H  | 0 0 | 0.00000 |
| HETATM | 116 | H  | 37.20190 | 35.92018 | 42.76325 | H  | 0 0 | 0.00000 |
| HETATM | 117 | H  | 37.80112 | 38.27900 | 43.62920 | H  | 0 0 | 0.00000 |
| HETATM | 118 | H  | 41.51365 | 38.92931 | 36.12008 | H  | 0 0 | 0.00000 |
| HETATM | 119 | H  | 40.13082 | 38.69517 | 34.07481 | H  | 0 0 | 0.00000 |
| HETATM | 120 | H  | 38.25999 | 36.95888 | 33.99943 | H  | 0 0 | 0.00000 |
| HETATM | 121 | H  | 37.89818 | 35.45282 | 35.93850 | H  | 0 0 | 0.00000 |
| HETATM | 122 | H  | 42.61179 | 38.81384 | 37.66993 | H  | 0 0 | 0.00000 |
| HETATM | 123 | H  | 46.75503 | 37.53274 | 41.73885 | H  | 0 0 | 0.00000 |
| HETATM | 124 | H  | 46.72297 | 39.25459 | 39.92591 | H  | 0 0 | 0.00000 |
| HETATM | 125 | H  | 44.75318 | 39.38560 | 38.36996 | H  | 0 0 | 0.00000 |
| HETATM | 126 | H  | 37.91325 | 34.27887 | 37.38888 | H  | 0 0 | 0.00000 |
| HETATM | 127 | H  | 36.88679 | 32.31230 | 38.20731 | H  | 0 0 | 0.00000 |
| HETATM | 128 | H  | 36.76559 | 30.35198 | 39.76633 | H  | 0 0 | 0.00000 |
| HETATM | 129 | H  | 38.50351 | 30.03484 | 41.53298 | H  | 0 0 | 0.00000 |
| HETATM | 130 | H  | 43.77598 | 36.93907 | 43.85953 | H  | 0 0 | 0.00000 |
| HETATM | 131 | H  | 43.82651 | 35.17280 | 44.25803 | H  | 0 0 | 0.00000 |
| HETATM | 132 | H  | 42.73693 | 35.77746 | 42.94017 | H  | 0 0 | 0.00000 |
| HETATM | 133 | H  | 46.33803 | 36.82292 | 43.62236 | H  | 0 0 | 0.00000 |
| HETATM | 134 | H  | 47.08782 | 35.64166 | 42.47290 | H  | 0 0 | 0.00000 |
| HETATM | 135 | H  | 46.27059 | 35.05294 | 43.97260 | H  | 0 0 | 0.00000 |
| HETATM | 136 | H  | 44.76129 | 33.50817 | 42.57599 | H  | 0 0 | 0.00000 |
| HETATM | 137 | H  | 45.60302 | 34.08761 | 41.07921 | H  | 0 0 | 0.00000 |
| HETATM | 138 | H  | 43.79898 | 34.19357 | 41.19420 | H  | 0 0 | 0.00000 |
| HETATM | 139 | H  | 40.34484 | 29.41690 | 42.18963 | H  | 0 0 | 0.00000 |
| HETATM | 140 | H  | 39.35084 | 30.33923 | 43.39400 | H  | 0 0 | 0.00000 |
| HETATM | 141 | H  | 41.12560 | 30.11558 | 43.66573 | H  | 0 0 | 0.00000 |
| HETATM | 142 | H  | 41.38847 | 32.54113 | 43.96791 | H  | 0 0 | 0.00000 |
| HETATM | 143 | H  | 39.65222 | 32.91272 | 43.60352 | H  | 0 0 | 0.00000 |
| HETATM | 144 | H  | 40.96640 | 33.72765 | 42.66356 | H  | 0 0 | 0.00000 |
| HETATM | 145 | H  | 42.04582 | 30.59725 | 40.75352 | H  | 0 0 | 0.00000 |
| HETATM | 146 | H  | 42.82744 | 31.34475 | 42.20643 | H  | 0 0 | 0.00000 |
| HETATM | 147 | H  | 42.26008 | 32.38885 | 40.83410 | H  | 0 0 | 0.00000 |
| HETATM | 148 | Ru | 43.34936 | 43.38903 | 39.49560 | Ru | 0 0 | 0.00000 |
| HETATM | 149 | O  | 42.21017 | 44.17257 | 40.70573 | O  | 0 0 | 0.00000 |
| HETATM | 150 | O  | 44.89741 | 43.64165 | 40.48908 | O  | 0 0 | 0.00000 |
| HETATM | 151 | N  | 43.04233 | 41.72276 | 40.82760 | N  | 0 0 | 0.00000 |
| HETATM | 152 | N  | 41.65144 | 42.80653 | 38.26540 | N  | 0 0 | 0.00000 |
| HETATM | 153 | N  | 44.41031 | 42.04339 | 38.14420 | N  | 0 0 | 0.00000 |
| HETATM | 154 | C  | 41.62510 | 40.40940 | 42.25117 | C  | 0 0 | 0.00000 |
| HETATM | 155 | C  | 41.81492 | 41.39119 | 41.28258 | C  | 0 0 | 0.00000 |

|        |     |   |          |          |          |   |     |         |
|--------|-----|---|----------|----------|----------|---|-----|---------|
| HETATM | 156 | C | 44.10668 | 41.08997 | 41.37683 | C | 0 0 | 0.00000 |
| HETATM | 157 | C | 44.01488 | 40.09890 | 42.35944 | C | 0 0 | 0.00000 |
| HETATM | 158 | C | 42.72300 | 39.72707 | 42.84062 | C | 0 0 | 0.00000 |
| HETATM | 159 | C | 42.09651 | 41.95135 | 37.19088 | C | 0 0 | 0.00000 |
| HETATM | 160 | C | 41.24968 | 41.59546 | 36.09486 | C | 0 0 | 0.00000 |
| HETATM | 161 | C | 41.74096 | 40.96581 | 34.93096 | C | 0 0 | 0.00000 |
| HETATM | 162 | C | 43.10456 | 40.55086 | 34.88785 | C | 0 0 | 0.00000 |
| HETATM | 163 | C | 43.93964 | 40.81369 | 35.99681 | C | 0 0 | 0.00000 |
| HETATM | 164 | C | 43.49781 | 41.56514 | 37.12851 | C | 0 0 | 0.00000 |
| HETATM | 165 | C | 40.46738 | 43.23611 | 38.41288 | C | 0 0 | 0.00000 |
| HETATM | 166 | C | 40.08746 | 44.22412 | 39.39600 | C | 0 0 | 0.00000 |
| HETATM | 167 | C | 40.96503 | 44.70666 | 40.44990 | C | 0 0 | 0.00000 |
| HETATM | 168 | C | 40.45529 | 45.76819 | 41.28872 | C | 0 0 | 0.00000 |
| HETATM | 169 | C | 39.14765 | 46.27776 | 41.08691 | C | 0 0 | 0.00000 |
| HETATM | 170 | C | 38.30868 | 45.78573 | 40.05997 | C | 0 0 | 0.00000 |
| HETATM | 171 | C | 38.78461 | 44.78161 | 39.20369 | C | 0 0 | 0.00000 |
| HETATM | 172 | C | 45.64116 | 41.75059 | 38.18985 | C | 0 0 | 0.00000 |
| HETATM | 173 | C | 46.56951 | 42.27491 | 39.16782 | C | 0 0 | 0.00000 |
| HETATM | 174 | C | 47.93034 | 41.85262 | 39.01300 | C | 0 0 | 0.00000 |
| HETATM | 175 | C | 48.91713 | 42.35123 | 39.87827 | C | 0 0 | 0.00000 |
| HETATM | 176 | C | 48.57584 | 43.28850 | 40.88210 | C | 0 0 | 0.00000 |
| HETATM | 177 | C | 47.23680 | 43.72003 | 41.05686 | C | 0 0 | 0.00000 |
| HETATM | 178 | C | 46.17612 | 43.20450 | 40.21659 | C | 0 0 | 0.00000 |
| HETATM | 179 | C | 41.27269 | 46.36645 | 42.38540 | C | 0 0 | 0.00000 |
| HETATM | 180 | C | 41.66872 | 45.29152 | 43.41335 | C | 0 0 | 0.00000 |
| HETATM | 181 | C | 40.52281 | 47.46951 | 43.14866 | C | 0 0 | 0.00000 |
| HETATM | 182 | C | 42.55576 | 46.96620 | 41.78313 | C | 0 0 | 0.00000 |
| HETATM | 183 | C | 46.95310 | 44.73906 | 42.11084 | C | 0 0 | 0.00000 |
| HETATM | 184 | C | 48.22113 | 45.14884 | 42.87756 | C | 0 0 | 0.00000 |
| HETATM | 185 | C | 45.94513 | 44.19698 | 43.13753 | C | 0 0 | 0.00000 |
| HETATM | 186 | C | 46.37463 | 46.00254 | 41.44845 | C | 0 0 | 0.00000 |
| HETATM | 187 | H | 40.96427 | 41.98899 | 40.85994 | H | 0 0 | 0.00000 |
| HETATM | 188 | H | 45.11058 | 41.43456 | 41.00292 | H | 0 0 | 0.00000 |
| HETATM | 189 | H | 44.93270 | 39.61657 | 42.76292 | H | 0 0 | 0.00000 |
| HETATM | 190 | H | 42.58943 | 38.95651 | 43.62961 | H | 0 0 | 0.00000 |
| HETATM | 191 | H | 40.17058 | 41.84654 | 36.12000 | H | 0 0 | 0.00000 |
| HETATM | 192 | H | 41.06435 | 40.76498 | 34.07502 | H | 0 0 | 0.00000 |
| HETATM | 193 | H | 43.50391 | 40.01345 | 34.00010 | H | 0 0 | 0.00000 |
| HETATM | 194 | H | 44.98888 | 40.45301 | 35.93868 | H | 0 0 | 0.00000 |
| HETATM | 195 | H | 39.72190 | 42.85745 | 37.66785 | H | 0 0 | 0.00000 |
| HETATM | 196 | H | 38.75854 | 47.08446 | 41.73973 | H | 0 0 | 0.00000 |
| HETATM | 197 | H | 37.28258 | 46.19560 | 39.92661 | H | 0 0 | 0.00000 |
| HETATM | 198 | H | 38.15505 | 44.42375 | 38.37036 | H | 0 0 | 0.00000 |
| HETATM | 199 | H | 45.99916 | 41.05264 | 37.38838 | H | 0 0 | 0.00000 |
| HETATM | 200 | H | 48.21429 | 41.14765 | 38.20733 | H | 0 0 | 0.00000 |
| HETATM | 201 | H | 49.97283 | 42.02299 | 39.76620 | H | 0 0 | 0.00000 |
| HETATM | 202 | H | 49.37890 | 43.68695 | 41.53285 | H | 0 0 | 0.00000 |
| HETATM | 203 | H | 40.76275 | 44.80068 | 43.85980 | H | 0 0 | 0.00000 |
| HETATM | 204 | H | 42.26736 | 45.72760 | 44.25793 | H | 0 0 | 0.00000 |
| HETATM | 205 | H | 42.28826 | 44.48163 | 42.93989 | H | 0 0 | 0.00000 |

|        |     |   |          |          |          |   |     |         |
|--------|-----|---|----------|----------|----------|---|-----|---------|
| HETATM | 206 | H | 39.58217 | 47.07783 | 43.62293 | H | 0 0 | 0.00000 |
| HETATM | 207 | H | 40.23039 | 48.31789 | 42.47284 | H | 0 0 | 0.00000 |
| HETATM | 208 | H | 41.14919 | 47.90452 | 43.97275 | H | 0 0 | 0.00000 |
| HETATM | 209 | H | 43.24116 | 47.36953 | 42.57629 | H | 0 0 | 0.00000 |
| HETATM | 210 | H | 42.31846 | 47.80883 | 41.07928 | H | 0 0 | 0.00000 |
| HETATM | 211 | H | 43.12887 | 46.19321 | 41.19439 | H | 0 0 | 0.00000 |
| HETATM | 212 | H | 48.99306 | 45.59022 | 42.18980 | H | 0 0 | 0.00000 |
| HETATM | 213 | H | 48.69114 | 44.26826 | 43.39412 | H | 0 0 | 0.00000 |
| HETATM | 214 | H | 47.99741 | 45.91721 | 43.66579 | H | 0 0 | 0.00000 |
| HETATM | 215 | H | 45.76558 | 44.93197 | 43.96785 | H | 0 0 | 0.00000 |
| HETATM | 216 | H | 46.31184 | 43.24271 | 43.60336 | H | 0 0 | 0.00000 |
| HETATM | 217 | H | 44.94915 | 43.97330 | 42.66372 | H | 0 0 | 0.00000 |
| HETATM | 218 | H | 47.12053 | 46.47363 | 40.75408 | H | 0 0 | 0.00000 |
| HETATM | 219 | H | 46.08295 | 46.77655 | 42.20728 | H | 0 0 | 0.00000 |
| HETATM | 220 | H | 45.46196 | 45.76361 | 40.83499 | H | 0 0 | 0.00000 |
| HETATM | 221 | C | 33.80065 | 40.70124 | 38.19736 | C | 0 0 | 0.00000 |
| HETATM | 222 | O | 32.93315 | 40.42639 | 37.50026 | O | 0 0 | 0.00000 |
| HETATM | 223 | C | 42.49345 | 34.28192 | 38.19808 | C | 0 0 | 0.00000 |
| HETATM | 224 | O | 43.16642 | 33.66845 | 37.50212 | O | 0 0 | 0.00000 |
| HETATM | 225 | C | 43.70315 | 45.01570 | 38.19655 | C | 0 0 | 0.00000 |
| HETATM | 226 | O | 43.89657 | 45.90304 | 37.49731 | O | 0 0 | 0.00000 |

The torsional drives were performed over 100000 iterations with a timestep of 0.25 fs. The code is interpreted very much in the same way as that of the bond restraints. The first four number define the torsion, the next one is the starting angle, then the two forces and finally the change in torsion angle per iteration.

Propellor flip from **3b**-in:

```
TORSION RESTRAINT 8 2 81 82 73.55 2500.00 0.5000 -0.0007355
TORSION RESTRAINT 81 2 154 155 93.56 2500.00 0.5000 -0.0009356
TORSION RESTRAINT 154 2 8 9 71.40 2500.00 0.5000 -0.0007140
```

Propellor flip from **3b**-out:

```
TORSION RESTRAINT 8 2 81 82 107.88 2500.00 0.5000 -0.0010788
TORSION RESTRAINT 81 2 154 155 106.39 2500.00 0.5000 -0.0010639
TORSION RESTRAINT 154 2 8 9 97.95 2500.00 0.5000 -0.0009795
```

Propellor flip from **3g**-in:

```
TORSION RESTRAINT 8 2 81 82 58.63 2500.00 0.5000 -0.0005863
TORSION RESTRAINT 81 2 154 155 97.37 2500.00 0.5000 -0.0009737
TORSION RESTRAINT 154 2 8 9 98.61 2500.00 0.5000 -0.0009861
```

Propellor flip from **3g**-out:

```
TORSION RESTRAINT 8 2 81 82 107.56 2500.00 0.5000 -0.0010756
TORSION RESTRAINT 81 2 154 155 126.88 2500.00 0.5000 -0.0012688
TORSION RESTRAINT 154 2 8 9 127.09 2500.00 0.5000 -0.0012709
```

Salphen rotation from **3b**-in clockwise:

```
TORSION RESTRAINT 3 1 5 12 30.30 2500.00 0.5000 -0.0018000
```

Salphen rotation from **3b**-in counterclockwise:

TORSION RESTRAINT 3 1 5 12 30.30 2500.00 0.5000 0.0018000

Salphen rotation from **3b**-out clockwise:

TORSION RESTRAINT 3 1 5 9 41.79 2500.00 0.5000 -0.0018000

Salphen rotation from **3b**-out counterclockwise:

TORSION RESTRAINT 3 1 5 9 41.79 2500.00 0.5000 0.0018000

Salphen rotation from **3g**-in clockwise:

TORSION RESTRAINT 4 1 5 11 -31.33 2500.00 0.5000 -0.0018000

Salphen rotation from **3g**-in counterclockwise:

TORSION RESTRAINT 4 1 5 11 -31.33 2500.00 0.5000 0.0018000

Salphen rotation from **3g**-out clockwise:

TORSION RESTRAINT 4 1 5 10 -31.76 2500.00 0.5000 -0.0018000

Salphen rotation from **3g**-out counterclockwise:

TORSION RESTRAINT 4 1 5 10 -31.76 2500.00 0.5000 0.0018000

The starting points for the pyridine rotations were obtained in the same way, but in a different run, thus resulting in a different geometry. The rotation of the three pyridine rings to go from the in to the out conformation can be performed via many different pathways. This was explored exhaustively, but only the lowest energy pathways for the zinc and ruthenium complexes are presented in the paper. For the zinc complex **3b** this pathway started from the in conformation, and involved the simultaneous rotation of all three pyridine groups, of which two clockwise and one counterclockwise. The pathway is presented in reverse in figures 13 and 14. For the ruthenium complex **3g**, the lowest pathway was from out to in was found when one pyridine ring was driven clockwise and one counterclockwise. The third ring then rotated spontaneously.

Starting structure for pyridine rotation of **3b**:

|        |    |    |          |          |          |    |   |   |         |
|--------|----|----|----------|----------|----------|----|---|---|---------|
| HETATM | 1  | Zn | 44.86981 | 42.93440 | 40.23051 | Zn | 1 | 0 | 0.00000 |
| HETATM | 2  | P  | 40.11157 | 40.09849 | 40.66690 | P  | 1 | 0 | 0.00000 |
| HETATM | 3  | O  | 45.19153 | 41.02912 | 41.45455 | O  | 2 | 0 | 0.00000 |
| HETATM | 4  | O  | 45.70777 | 41.81531 | 38.61369 | O  | 2 | 0 | 0.00000 |
| HETATM | 5  | N  | 43.07726 | 42.57309 | 39.51702 | N  | 2 | 0 | 0.00000 |
| HETATM | 6  | N  | 44.27316 | 43.97871 | 41.86603 | N  | 3 | 0 | 0.00000 |
| HETATM | 7  | N  | 45.26613 | 44.78341 | 39.34925 | N  | 3 | 0 | 0.00000 |
| HETATM | 8  | C  | 40.98093 | 41.45703 | 39.66979 | C  | 3 | 0 | 0.00000 |
| HETATM | 9  | C  | 40.63216 | 41.84667 | 38.36081 | C  | 3 | 0 | 0.00000 |
| HETATM | 10 | C  | 41.57800 | 42.63008 | 37.63599 | C  | 3 | 0 | 0.00000 |
| HETATM | 11 | C  | 42.80610 | 42.96684 | 38.34059 | C  | 3 | 0 | 0.00000 |
| HETATM | 12 | C  | 42.23290 | 41.85021 | 40.20259 | C  | 3 | 0 | 0.00000 |
| HETATM | 13 | C  | 44.50766 | 45.32827 | 41.60964 | C  | 3 | 0 | 0.00000 |
| HETATM | 14 | C  | 45.05606 | 45.77163 | 40.29396 | C  | 3 | 0 | 0.00000 |
| HETATM | 15 | C  | 45.25340 | 47.17064 | 40.08387 | C  | 3 | 0 | 0.00000 |
| HETATM | 16 | C  | 44.86125 | 48.17391 | 41.01349 | C  | 3 | 0 | 0.00000 |
| HETATM | 17 | C  | 44.31497 | 47.68647 | 42.22067 | C  | 3 | 0 | 0.00000 |

|        |    |   |          |          |          |   |   |   |         |
|--------|----|---|----------|----------|----------|---|---|---|---------|
| HETATM | 18 | C | 44.21805 | 46.33283 | 42.58063 | C | 3 | 0 | 0.00000 |
| HETATM | 19 | C | 43.82647 | 43.38161 | 42.85577 | C | 4 | 0 | 0.00000 |
| HETATM | 20 | C | 43.51582 | 41.91613 | 42.94170 | C | 3 | 0 | 0.00000 |
| HETATM | 21 | C | 42.40720 | 41.61466 | 43.76538 | C | 3 | 0 | 0.00000 |
| HETATM | 22 | C | 41.81252 | 40.28870 | 43.79008 | C | 3 | 0 | 0.00000 |
| HETATM | 23 | C | 42.39271 | 39.24727 | 43.06472 | C | 3 | 0 | 0.00000 |
| HETATM | 24 | C | 43.62545 | 39.45127 | 42.36090 | C | 3 | 0 | 0.00000 |
| HETATM | 25 | C | 44.17919 | 40.78645 | 42.30019 | C | 3 | 0 | 0.00000 |
| HETATM | 26 | C | 45.58004 | 44.89815 | 38.15211 | C | 4 | 0 | 0.00000 |
| HETATM | 27 | C | 45.79503 | 43.79024 | 37.16419 | C | 3 | 0 | 0.00000 |
| HETATM | 28 | C | 45.75077 | 42.37502 | 37.37390 | C | 3 | 0 | 0.00000 |
| HETATM | 29 | C | 45.73552 | 41.51757 | 36.17914 | C | 3 | 0 | 0.00000 |
| HETATM | 30 | C | 45.92156 | 42.04373 | 34.88789 | C | 3 | 0 | 0.00000 |
| HETATM | 31 | C | 46.00333 | 43.45915 | 34.75218 | C | 3 | 0 | 0.00000 |
| HETATM | 32 | C | 45.97656 | 44.34516 | 35.87397 | C | 3 | 0 | 0.00000 |
| HETATM | 33 | C | 44.29563 | 38.35960 | 41.61901 | C | 4 | 0 | 0.00000 |
| HETATM | 34 | C | 45.75213 | 38.14635 | 42.07686 | C | 4 | 0 | 0.00000 |
| HETATM | 35 | C | 44.27002 | 38.60510 | 40.08936 | C | 4 | 0 | 0.00000 |
| HETATM | 36 | C | 43.55355 | 37.00790 | 41.85589 | C | 4 | 0 | 0.00000 |
| HETATM | 37 | C | 45.64929 | 40.05974 | 36.44289 | C | 4 | 0 | 0.00000 |
| HETATM | 38 | C | 45.64271 | 39.21360 | 35.14860 | C | 4 | 0 | 0.00000 |
| HETATM | 39 | C | 46.77102 | 39.53179 | 37.33954 | C | 4 | 0 | 0.00000 |
| HETATM | 40 | C | 44.28460 | 39.84202 | 37.12873 | C | 4 | 0 | 0.00000 |
| HETATM | 41 | H | 39.62841 | 41.54557 | 37.90807 | H | 1 | 0 | 0.00000 |
| HETATM | 42 | H | 41.34152 | 43.12130 | 36.68608 | H | 1 | 0 | 0.00000 |
| HETATM | 43 | H | 43.54895 | 43.60668 | 37.79339 | H | 1 | 0 | 0.00000 |
| HETATM | 44 | H | 42.51627 | 41.45936 | 41.26653 | H | 1 | 0 | 0.00000 |
| HETATM | 45 | H | 45.73986 | 47.39939 | 39.12706 | H | 1 | 0 | 0.00000 |
| HETATM | 46 | H | 44.95220 | 49.29773 | 40.79066 | H | 1 | 0 | 0.00000 |
| HETATM | 47 | H | 43.97326 | 48.47169 | 42.93150 | H | 1 | 0 | 0.00000 |
| HETATM | 48 | H | 43.77312 | 46.01256 | 43.55951 | H | 1 | 0 | 0.00000 |
| HETATM | 49 | H | 43.56205 | 44.03423 | 43.80396 | H | 1 | 0 | 0.00000 |
| HETATM | 50 | H | 41.87486 | 42.43524 | 44.29759 | H | 1 | 0 | 0.00000 |
| HETATM | 51 | H | 40.90766 | 40.06776 | 44.43273 | H | 1 | 0 | 0.00000 |
| HETATM | 52 | H | 41.91427 | 38.27345 | 43.09814 | H | 1 | 0 | 0.00000 |
| HETATM | 53 | H | 45.72245 | 45.93525 | 37.79287 | H | 1 | 0 | 0.00000 |
| HETATM | 54 | H | 45.92940 | 41.42492 | 33.99045 | H | 1 | 0 | 0.00000 |
| HETATM | 55 | H | 46.14068 | 44.02204 | 33.75506 | H | 1 | 0 | 0.00000 |
| HETATM | 56 | H | 46.03323 | 45.40066 | 35.68917 | H | 1 | 0 | 0.00000 |
| HETATM | 57 | H | 46.31287 | 39.13052 | 41.97551 | H | 1 | 0 | 0.00000 |
| HETATM | 58 | H | 46.21981 | 37.31307 | 41.45723 | H | 1 | 0 | 0.00000 |
| HETATM | 59 | H | 45.75536 | 37.85989 | 43.15286 | H | 1 | 0 | 0.00000 |
| HETATM | 60 | H | 44.74953 | 39.58084 | 39.89329 | H | 1 | 0 | 0.00000 |
| HETATM | 61 | H | 43.21816 | 38.69112 | 39.72232 | H | 1 | 0 | 0.00000 |
| HETATM | 62 | H | 44.79259 | 37.84490 | 39.47932 | H | 1 | 0 | 0.00000 |
| HETATM | 63 | H | 43.91504 | 36.22960 | 41.13157 | H | 1 | 0 | 0.00000 |
| HETATM | 64 | H | 42.46848 | 37.11193 | 41.60866 | H | 1 | 0 | 0.00000 |
| HETATM | 65 | H | 43.68103 | 36.61328 | 42.84777 | H | 1 | 0 | 0.00000 |
| HETATM | 66 | H | 44.90316 | 39.43538 | 34.40306 | H | 1 | 0 | 0.00000 |
| HETATM | 67 | H | 45.46551 | 38.12864 | 35.30050 | H | 1 | 0 | 0.00000 |

|        |     |    |          |          |          |    |   |   |         |
|--------|-----|----|----------|----------|----------|----|---|---|---------|
| HETATM | 68  | H  | 46.62929 | 39.24366 | 34.65311 | H  | 1 | 0 | 0.00000 |
| HETATM | 69  | H  | 47.80812 | 39.73733 | 36.90568 | H  | 1 | 0 | 0.00000 |
| HETATM | 70  | H  | 46.67067 | 38.39747 | 37.50230 | H  | 1 | 0 | 0.00000 |
| HETATM | 71  | H  | 46.69127 | 39.89960 | 38.38066 | H  | 1 | 0 | 0.00000 |
| HETATM | 72  | H  | 44.31653 | 40.28023 | 38.14311 | H  | 1 | 0 | 0.00000 |
| HETATM | 73  | H  | 44.09205 | 38.72691 | 37.25104 | H  | 1 | 0 | 0.00000 |
| HETATM | 74  | H  | 43.38305 | 40.28813 | 36.60883 | H  | 1 | 0 | 0.00000 |
| HETATM | 75  | Zn | 35.02434 | 42.51480 | 40.59606 | Zn | 1 | 0 | 0.00000 |
| HETATM | 76  | O  | 36.30501 | 43.72331 | 41.87863 | O  | 2 | 0 | 0.00000 |
| HETATM | 77  | O  | 35.61964 | 43.83664 | 38.97683 | O  | 2 | 0 | 0.00000 |
| HETATM | 78  | N  | 36.30331 | 41.14858 | 39.79822 | N  | 2 | 0 | 0.00000 |
| HETATM | 79  | N  | 34.47910 | 41.58694 | 42.29229 | N  | 3 | 0 | 0.00000 |
| HETATM | 80  | N  | 33.27724 | 41.88103 | 39.82479 | N  | 3 | 0 | 0.00000 |
| HETATM | 81  | C  | 38.41606 | 40.22838 | 39.86484 | C  | 3 | 0 | 0.00000 |
| HETATM | 82  | C  | 38.28600 | 39.70922 | 38.53430 | C  | 3 | 0 | 0.00000 |
| HETATM | 83  | C  | 37.01611 | 39.84591 | 37.93318 | C  | 3 | 0 | 0.00000 |
| HETATM | 84  | C  | 36.06263 | 40.66905 | 38.64908 | C  | 3 | 0 | 0.00000 |
| HETATM | 85  | C  | 37.42647 | 41.01032 | 40.45747 | C  | 3 | 0 | 0.00000 |
| HETATM | 86  | C  | 33.28020 | 41.05871 | 42.10302 | C  | 3 | 0 | 0.00000 |
| HETATM | 87  | C  | 32.55856 | 41.24230 | 40.79486 | C  | 3 | 0 | 0.00000 |
| HETATM | 88  | C  | 31.29254 | 40.59755 | 40.60474 | C  | 3 | 0 | 0.00000 |
| HETATM | 89  | C  | 30.55434 | 39.99367 | 41.64925 | C  | 3 | 0 | 0.00000 |
| HETATM | 90  | C  | 31.21223 | 39.90786 | 42.86993 | C  | 3 | 0 | 0.00000 |
| HETATM | 91  | C  | 32.54392 | 40.36126 | 43.16650 | C  | 3 | 0 | 0.00000 |
| HETATM | 92  | C  | 35.25262 | 41.51042 | 43.27950 | C  | 4 | 0 | 0.00000 |
| HETATM | 93  | C  | 36.56848 | 42.09712 | 43.51400 | C  | 3 | 0 | 0.00000 |
| HETATM | 94  | C  | 37.33842 | 41.48404 | 44.58493 | C  | 3 | 0 | 0.00000 |
| HETATM | 95  | C  | 38.69063 | 41.77630 | 44.64869 | C  | 3 | 0 | 0.00000 |
| HETATM | 96  | C  | 39.35662 | 42.75907 | 43.86108 | C  | 3 | 0 | 0.00000 |
| HETATM | 97  | C  | 38.58575 | 43.45795 | 42.87221 | C  | 3 | 0 | 0.00000 |
| HETATM | 98  | C  | 37.17381 | 43.14630 | 42.74887 | C  | 3 | 0 | 0.00000 |
| HETATM | 99  | C  | 33.08630 | 42.12932 | 38.61793 | C  | 4 | 0 | 0.00000 |
| HETATM | 100 | C  | 33.90708 | 42.84487 | 37.57781 | C  | 3 | 0 | 0.00000 |
| HETATM | 101 | C  | 35.17315 | 43.58181 | 37.70635 | C  | 3 | 0 | 0.00000 |
| HETATM | 102 | C  | 35.84363 | 44.08351 | 36.53792 | C  | 3 | 0 | 0.00000 |
| HETATM | 103 | C  | 35.35208 | 43.81683 | 35.22861 | C  | 3 | 0 | 0.00000 |
| HETATM | 104 | C  | 34.17157 | 43.03345 | 35.08093 | C  | 3 | 0 | 0.00000 |
| HETATM | 105 | C  | 33.49051 | 42.54785 | 36.23842 | C  | 3 | 0 | 0.00000 |
| HETATM | 106 | C  | 39.20911 | 44.47977 | 41.95408 | C  | 4 | 0 | 0.00000 |
| HETATM | 107 | C  | 38.54084 | 45.83340 | 42.23088 | C  | 4 | 0 | 0.00000 |
| HETATM | 108 | C  | 38.90226 | 44.10453 | 40.48657 | C  | 4 | 0 | 0.00000 |
| HETATM | 109 | C  | 40.72111 | 44.56053 | 42.09177 | C  | 4 | 0 | 0.00000 |
| HETATM | 110 | C  | 37.12534 | 44.85109 | 36.80092 | C  | 4 | 0 | 0.00000 |
| HETATM | 111 | C  | 37.78416 | 45.25729 | 35.48676 | C  | 4 | 0 | 0.00000 |
| HETATM | 112 | C  | 36.73961 | 46.09004 | 37.61247 | C  | 4 | 0 | 0.00000 |
| HETATM | 113 | C  | 38.08927 | 43.85214 | 37.51461 | C  | 4 | 0 | 0.00000 |
| HETATM | 114 | H  | 39.09493 | 39.19256 | 37.97504 | H  | 1 | 0 | 0.00000 |
| HETATM | 115 | H  | 36.79234 | 39.48397 | 36.89188 | H  | 1 | 0 | 0.00000 |
| HETATM | 116 | H  | 35.08569 | 40.88732 | 38.08937 | H  | 1 | 0 | 0.00000 |
| HETATM | 117 | H  | 37.61295 | 41.59691 | 41.39082 | H  | 1 | 0 | 0.00000 |



|        |     |    |          |          |          |    |   |   |         |
|--------|-----|----|----------|----------|----------|----|---|---|---------|
| HETATM | 118 | H  | 30.73778 | 40.77440 | 39.68342 | H  | 1 | 0 | 0.00000 |
| HETATM | 119 | H  | 29.56476 | 39.64422 | 41.51665 | H  | 1 | 0 | 0.00000 |
| HETATM | 120 | H  | 30.68585 | 39.53096 | 43.74118 | H  | 1 | 0 | 0.00000 |
| HETATM | 121 | H  | 32.94649 | 40.30902 | 44.19341 | H  | 1 | 0 | 0.00000 |
| HETATM | 122 | H  | 34.86893 | 40.84879 | 44.06338 | H  | 1 | 0 | 0.00000 |
| HETATM | 123 | H  | 36.84869 | 40.74343 | 45.19281 | H  | 1 | 0 | 0.00000 |
| HETATM | 124 | H  | 39.34088 | 41.31312 | 45.47332 | H  | 1 | 0 | 0.00000 |
| HETATM | 125 | H  | 40.42168 | 42.84429 | 43.97658 | H  | 1 | 0 | 0.00000 |
| HETATM | 126 | H  | 32.07904 | 41.84432 | 38.28520 | H  | 1 | 0 | 0.00000 |
| HETATM | 127 | H  | 35.83490 | 44.28902 | 34.35196 | H  | 1 | 0 | 0.00000 |
| HETATM | 128 | H  | 33.81125 | 42.75659 | 34.05115 | H  | 1 | 0 | 0.00000 |
| HETATM | 129 | H  | 32.55311 | 41.96016 | 36.11624 | H  | 1 | 0 | 0.00000 |
| HETATM | 130 | H  | 37.44225 | 45.64096 | 42.37289 | H  | 1 | 0 | 0.00000 |
| HETATM | 131 | H  | 38.55061 | 46.54971 | 41.35219 | H  | 1 | 0 | 0.00000 |
| HETATM | 132 | H  | 39.00354 | 46.31186 | 43.15949 | H  | 1 | 0 | 0.00000 |
| HETATM | 133 | H  | 37.83407 | 44.00477 | 40.20980 | H  | 1 | 0 | 0.00000 |
| HETATM | 134 | H  | 39.31639 | 43.02200 | 40.36325 | H  | 1 | 0 | 0.00000 |
| HETATM | 135 | H  | 39.41668 | 44.72577 | 39.73915 | H  | 1 | 0 | 0.00000 |
| HETATM | 136 | H  | 41.13856 | 45.30029 | 41.36181 | H  | 1 | 0 | 0.00000 |
| HETATM | 137 | H  | 41.26538 | 43.59547 | 41.86954 | H  | 1 | 0 | 0.00000 |
| HETATM | 138 | H  | 41.05267 | 44.90440 | 43.07507 | H  | 1 | 0 | 0.00000 |
| HETATM | 139 | H  | 38.12705 | 44.35251 | 34.86210 | H  | 1 | 0 | 0.00000 |
| HETATM | 140 | H  | 38.67445 | 45.95853 | 35.64907 | H  | 1 | 0 | 0.00000 |
| HETATM | 141 | H  | 37.04832 | 45.83829 | 34.93049 | H  | 1 | 0 | 0.00000 |
| HETATM | 142 | H  | 35.84850 | 46.66824 | 37.26786 | H  | 1 | 0 | 0.00000 |
| HETATM | 143 | H  | 37.55464 | 46.79656 | 37.70298 | H  | 1 | 0 | 0.00000 |
| HETATM | 144 | H  | 36.46489 | 45.70653 | 38.61988 | H  | 1 | 0 | 0.00000 |
| HETATM | 145 | H  | 37.61789 | 43.25117 | 38.34601 | H  | 1 | 0 | 0.00000 |
| HETATM | 146 | H  | 38.98990 | 44.38152 | 37.91386 | H  | 1 | 0 | 0.00000 |
| HETATM | 147 | H  | 38.46347 | 43.05557 | 36.84380 | H  | 1 | 0 | 0.00000 |
| HETATM | 148 | Zn | 40.03959 | 34.58702 | 40.46546 | Zn | 1 | 0 | 0.00000 |
| HETATM | 149 | O  | 38.20505 | 35.15321 | 41.25540 | O  | 2 | 0 | 0.00000 |
| HETATM | 150 | O  | 39.01947 | 34.14916 | 38.65543 | O  | 2 | 0 | 0.00000 |
| HETATM | 151 | N  | 40.71030 | 36.28086 | 39.64020 | N  | 2 | 0 | 0.00000 |
| HETATM | 152 | N  | 40.85577 | 34.41183 | 42.40910 | N  | 3 | 0 | 0.00000 |
| HETATM | 153 | N  | 41.50675 | 33.13097 | 39.96089 | N  | 3 | 0 | 0.00000 |
| HETATM | 154 | C  | 40.72521 | 38.61893 | 39.71675 | C  | 3 | 0 | 0.00000 |
| HETATM | 155 | C  | 41.48732 | 38.71669 | 38.53567 | C  | 3 | 0 | 0.00000 |
| HETATM | 156 | C  | 41.76915 | 37.48795 | 37.87160 | C  | 3 | 0 | 0.00000 |
| HETATM | 157 | C  | 41.32107 | 36.26725 | 38.52320 | C  | 3 | 0 | 0.00000 |
| HETATM | 158 | C  | 40.38384 | 37.35252 | 40.26500 | C  | 3 | 0 | 0.00000 |
| HETATM | 159 | C  | 41.85956 | 33.44920 | 42.36672 | C  | 3 | 0 | 0.00000 |
| HETATM | 160 | C  | 42.22357 | 32.79783 | 41.13290 | C  | 3 | 0 | 0.00000 |
| HETATM | 161 | C  | 43.38891 | 31.94702 | 41.11711 | C  | 3 | 0 | 0.00000 |
| HETATM | 162 | C  | 44.14112 | 31.65371 | 42.26299 | C  | 3 | 0 | 0.00000 |
| HETATM | 163 | C  | 43.67645 | 32.13883 | 43.51146 | C  | 3 | 0 | 0.00000 |
| HETATM | 164 | C  | 42.58612 | 33.01635 | 43.54984 | C  | 3 | 0 | 0.00000 |
| HETATM | 165 | C  | 40.40789 | 35.13626 | 43.30833 | C  | 4 | 0 | 0.00000 |
| HETATM | 166 | C  | 39.28174 | 36.10623 | 43.22965 | C  | 3 | 0 | 0.00000 |
| HETATM | 167 | C  | 39.21416 | 37.07725 | 44.26022 | C  | 3 | 0 | 0.00000 |



|        |     |   |          |          |          |   |   |   |         |
|--------|-----|---|----------|----------|----------|---|---|---|---------|
| HETATM | 168 | C | 38.13109 | 37.95500 | 44.33771 | C | 3 | 0 | 0.00000 |
| HETATM | 169 | C | 37.18097 | 38.04650 | 43.29216 | C | 3 | 0 | 0.00000 |
| HETATM | 170 | C | 37.14254 | 37.09206 | 42.24734 | C | 3 | 0 | 0.00000 |
| HETATM | 171 | C | 38.18558 | 36.08348 | 42.26356 | C | 3 | 0 | 0.00000 |
| HETATM | 172 | C | 41.68707 | 32.83960 | 38.77391 | C | 4 | 0 | 0.00000 |
| HETATM | 173 | C | 40.96200 | 33.30903 | 37.53498 | C | 3 | 0 | 0.00000 |
| HETATM | 174 | C | 39.71921 | 33.98268 | 37.50089 | C | 3 | 0 | 0.00000 |
| HETATM | 175 | C | 39.16291 | 34.50099 | 36.25751 | C | 3 | 0 | 0.00000 |
| HETATM | 176 | C | 39.87727 | 34.22328 | 35.04776 | C | 3 | 0 | 0.00000 |
| HETATM | 177 | C | 41.12553 | 33.56755 | 35.10039 | C | 3 | 0 | 0.00000 |
| HETATM | 178 | C | 41.61560 | 33.08021 | 36.32352 | C | 3 | 0 | 0.00000 |
| HETATM | 179 | C | 36.08508 | 37.08945 | 41.17819 | C | 4 | 0 | 0.00000 |
| HETATM | 180 | C | 35.30957 | 35.74895 | 41.14580 | C | 4 | 0 | 0.00000 |
| HETATM | 181 | C | 36.67436 | 37.17583 | 39.75323 | C | 4 | 0 | 0.00000 |
| HETATM | 182 | C | 35.14719 | 38.25217 | 41.44857 | C | 4 | 0 | 0.00000 |
| HETATM | 183 | C | 37.99474 | 35.40117 | 36.26301 | C | 4 | 0 | 0.00000 |
| HETATM | 184 | C | 37.47401 | 35.67087 | 34.83157 | C | 4 | 0 | 0.00000 |
| HETATM | 185 | C | 36.82388 | 34.86874 | 37.10711 | C | 4 | 0 | 0.00000 |
| HETATM | 186 | C | 38.45009 | 36.72540 | 36.92030 | C | 4 | 0 | 0.00000 |
| HETATM | 187 | H | 41.81392 | 39.70938 | 38.25251 | H | 1 | 0 | 0.00000 |
| HETATM | 188 | H | 42.35764 | 37.45855 | 36.93133 | H | 1 | 0 | 0.00000 |
| HETATM | 189 | H | 41.55521 | 35.29328 | 37.98822 | H | 1 | 0 | 0.00000 |
| HETATM | 190 | H | 39.84669 | 37.20705 | 41.23179 | H | 1 | 0 | 0.00000 |
| HETATM | 191 | H | 43.79192 | 31.37723 | 40.18755 | H | 1 | 0 | 0.00000 |
| HETATM | 192 | H | 44.99289 | 31.00834 | 42.21266 | H | 1 | 0 | 0.00000 |
| HETATM | 193 | H | 44.21619 | 31.84844 | 44.40894 | H | 1 | 0 | 0.00000 |
| HETATM | 194 | H | 42.41616 | 33.45846 | 44.59096 | H | 1 | 0 | 0.00000 |
| HETATM | 195 | H | 40.95989 | 35.07582 | 44.32433 | H | 1 | 0 | 0.00000 |
| HETATM | 196 | H | 39.99631 | 37.13419 | 45.08764 | H | 1 | 0 | 0.00000 |
| HETATM | 197 | H | 38.11312 | 38.74483 | 45.06479 | H | 1 | 0 | 0.00000 |
| HETATM | 198 | H | 36.44143 | 38.87161 | 43.21833 | H | 1 | 0 | 0.00000 |
| HETATM | 199 | H | 42.52347 | 32.08176 | 38.55246 | H | 1 | 0 | 0.00000 |
| HETATM | 200 | H | 39.59950 | 34.80191 | 34.15496 | H | 1 | 0 | 0.00000 |
| HETATM | 201 | H | 41.55724 | 33.28105 | 34.10767 | H | 1 | 0 | 0.00000 |
| HETATM | 202 | H | 42.57790 | 32.47653 | 36.31498 | H | 1 | 0 | 0.00000 |
| HETATM | 203 | H | 35.92591 | 34.90587 | 40.89335 | H | 1 | 0 | 0.00000 |
| HETATM | 204 | H | 34.41075 | 35.73645 | 40.44602 | H | 1 | 0 | 0.00000 |
| HETATM | 205 | H | 34.90329 | 35.49366 | 42.15698 | H | 1 | 0 | 0.00000 |
| HETATM | 206 | H | 37.55687 | 36.44612 | 39.71733 | H | 1 | 0 | 0.00000 |
| HETATM | 207 | H | 37.02943 | 38.22188 | 39.67856 | H | 1 | 0 | 0.00000 |
| HETATM | 208 | H | 35.89654 | 36.89070 | 38.97344 | H | 1 | 0 | 0.00000 |
| HETATM | 209 | H | 34.40798 | 38.41554 | 40.58755 | H | 1 | 0 | 0.00000 |
| HETATM | 210 | H | 35.72156 | 39.19402 | 41.66922 | H | 1 | 0 | 0.00000 |
| HETATM | 211 | H | 34.63880 | 38.07192 | 42.39564 | H | 1 | 0 | 0.00000 |
| HETATM | 212 | H | 38.26476 | 35.92054 | 34.08407 | H | 1 | 0 | 0.00000 |
| HETATM | 213 | H | 36.67773 | 36.46260 | 34.92924 | H | 1 | 0 | 0.00000 |
| HETATM | 214 | H | 36.94156 | 34.82976 | 34.42543 | H | 1 | 0 | 0.00000 |
| HETATM | 215 | H | 36.55889 | 33.85535 | 36.74356 | H | 1 | 0 | 0.00000 |
| HETATM | 216 | H | 35.93049 | 35.56008 | 37.13082 | H | 1 | 0 | 0.00000 |
| HETATM | 217 | H | 37.10252 | 34.64698 | 38.16901 | H | 1 | 0 | 0.00000 |

|        |       |          |          |          |   |     |         |
|--------|-------|----------|----------|----------|---|-----|---------|
| HETATM | 218 H | 38.86321 | 36.52826 | 37.95640 | H | 1 0 | 0.00000 |
| HETATM | 219 H | 37.64155 | 37.52013 | 36.99542 | H | 1 0 | 0.00000 |
| HETATM | 220 H | 39.27959 | 37.18872 | 36.34953 | H | 1 0 | 0.00000 |

Restraints for pyridine rotation of **3b**:

|                   |     |   |     |     |        |         |        |           |
|-------------------|-----|---|-----|-----|--------|---------|--------|-----------|
| TORSION RESTRAINT | 154 | 2 | 8   | 12  | -93.83 | 2500.00 | 0.5000 | 0.001800  |
| TORSION RESTRAINT | 154 | 2 | 81  | 85  | 164.92 | 2500.00 | 0.5000 | -0.001800 |
| TORSION RESTRAINT | 8   | 2 | 154 | 158 | 173.73 | 2500.00 | 0.5000 | -0.001800 |

Starting structure for pyridine rotation of **3g**:

|        |      |          |          |          |    |     |         |
|--------|------|----------|----------|----------|----|-----|---------|
| HETATM | 1 Ru | 35.05573 | 41.48872 | 39.85987 | Ru | 0 0 | 0.00000 |
| HETATM | 2 P  | 40.11720 | 40.06009 | 42.59589 | P  | 0 0 | 0.00000 |
| HETATM | 3 O  | 35.11216 | 40.01083 | 40.99232 | O  | 0 0 | 0.00000 |
| HETATM | 4 O  | 34.53711 | 42.81268 | 41.12442 | O  | 0 0 | 0.00000 |
| HETATM | 5 N  | 36.86658 | 42.05826 | 40.95953 | N  | 0 0 | 0.00000 |
| HETATM | 6 N  | 36.57143 | 40.62427 | 38.47554 | N  | 0 0 | 0.00000 |
| HETATM | 7 N  | 35.41073 | 43.18736 | 38.51775 | N  | 0 0 | 0.00000 |
| HETATM | 8 C  | 39.09729 | 41.36498 | 41.63415 | C  | 0 0 | 0.00000 |
| HETATM | 9 C  | 37.87201 | 41.10088 | 41.06520 | C  | 0 0 | 0.00000 |
| HETATM | 10 C | 37.14382 | 43.28370 | 41.48208 | C  | 0 0 | 0.00000 |
| HETATM | 11 C | 38.42156 | 43.67418 | 41.95043 | C  | 0 0 | 0.00000 |
| HETATM | 12 C | 39.43368 | 42.69529 | 42.05197 | C  | 0 0 | 0.00000 |
| HETATM | 13 C | 37.15933 | 41.65237 | 37.62029 | C  | 0 0 | 0.00000 |
| HETATM | 14 C | 38.24486 | 41.47060 | 36.71568 | C  | 0 0 | 0.00000 |
| HETATM | 15 C | 38.60058 | 42.40811 | 35.73379 | C  | 0 0 | 0.00000 |
| HETATM | 16 C | 37.92169 | 43.65795 | 35.71081 | C  | 0 0 | 0.00000 |
| HETATM | 17 C | 36.87340 | 43.89012 | 36.62218 | C  | 0 0 | 0.00000 |
| HETATM | 18 C | 36.45324 | 42.92396 | 37.62319 | C  | 0 0 | 0.00000 |
| HETATM | 19 C | 36.88147 | 39.39006 | 38.49316 | C  | 0 0 | 0.00000 |
| HETATM | 20 C | 36.24782 | 38.42578 | 39.36817 | C  | 0 0 | 0.00000 |
| HETATM | 21 C | 35.25578 | 38.77997 | 40.41121 | C  | 0 0 | 0.00000 |
| HETATM | 22 C | 34.36738 | 37.70781 | 40.90542 | C  | 0 0 | 0.00000 |
| HETATM | 23 C | 34.64548 | 36.41537 | 40.39437 | C  | 0 0 | 0.00000 |
| HETATM | 24 C | 35.63788 | 36.15082 | 39.43128 | C  | 0 0 | 0.00000 |
| HETATM | 25 C | 36.48935 | 37.10049 | 38.84421 | C  | 0 0 | 0.00000 |
| HETATM | 26 C | 34.61306 | 44.21102 | 38.55089 | C  | 0 0 | 0.00000 |
| HETATM | 27 C | 33.54707 | 44.27519 | 39.49789 | C  | 0 0 | 0.00000 |
| HETATM | 28 C | 32.36864 | 44.93290 | 38.99735 | C  | 0 0 | 0.00000 |
| HETATM | 29 C | 31.27227 | 45.12549 | 39.82132 | C  | 0 0 | 0.00000 |
| HETATM | 30 C | 31.16520 | 44.41185 | 41.02499 | C  | 0 0 | 0.00000 |
| HETATM | 31 C | 32.27532 | 43.68677 | 41.61789 | C  | 0 0 | 0.00000 |
| HETATM | 32 C | 33.43871 | 43.53721 | 40.78222 | C  | 0 0 | 0.00000 |
| HETATM | 33 C | 33.20715 | 37.86321 | 41.79650 | C  | 0 0 | 0.00000 |
| HETATM | 34 C | 33.78960 | 38.16111 | 43.18844 | C  | 0 0 | 0.00000 |
| HETATM | 35 C | 32.37904 | 36.57907 | 42.01186 | C  | 0 0 | 0.00000 |
| HETATM | 36 C | 32.20219 | 38.91576 | 41.28070 | C  | 0 0 | 0.00000 |
| HETATM | 37 C | 32.32478 | 43.15032 | 42.98476 | C  | 0 0 | 0.00000 |
| HETATM | 38 C | 30.99981 | 43.11993 | 43.74687 | C  | 0 0 | 0.00000 |
| HETATM | 39 C | 33.24674 | 44.06506 | 43.81691 | C  | 0 0 | 0.00000 |

|        |    |    |          |          |          |    |     |         |
|--------|----|----|----------|----------|----------|----|-----|---------|
| HETATM | 40 | C  | 32.77501 | 41.67527 | 42.88640 | C  | 0 0 | 0.00000 |
| HETATM | 41 | H  | 37.58810 | 40.07366 | 40.69229 | H  | 0 0 | 0.00000 |
| HETATM | 42 | H  | 36.32848 | 44.05268 | 41.36987 | H  | 0 0 | 0.00000 |
| HETATM | 43 | H  | 38.70632 | 44.71435 | 42.22742 | H  | 0 0 | 0.00000 |
| HETATM | 44 | H  | 40.45385 | 42.96505 | 42.39780 | H  | 0 0 | 0.00000 |
| HETATM | 45 | H  | 38.82409 | 40.53905 | 36.72084 | H  | 0 0 | 0.00000 |
| HETATM | 46 | H  | 39.41775 | 42.17466 | 35.00203 | H  | 0 0 | 0.00000 |
| HETATM | 47 | H  | 38.30477 | 44.50269 | 35.09524 | H  | 0 0 | 0.00000 |
| HETATM | 48 | H  | 36.44085 | 44.93172 | 36.60659 | H  | 0 0 | 0.00000 |
| HETATM | 49 | H  | 37.66424 | 39.08531 | 37.76838 | H  | 0 0 | 0.00000 |
| HETATM | 50 | H  | 34.04965 | 35.49883 | 40.75608 | H  | 0 0 | 0.00000 |
| HETATM | 51 | H  | 35.77576 | 35.12431 | 39.06831 | H  | 0 0 | 0.00000 |
| HETATM | 52 | H  | 37.20485 | 36.91025 | 38.03323 | H  | 0 0 | 0.00000 |
| HETATM | 53 | H  | 34.66357 | 44.85207 | 37.64452 | H  | 0 0 | 0.00000 |
| HETATM | 54 | H  | 32.40031 | 45.35880 | 37.98109 | H  | 0 0 | 0.00000 |
| HETATM | 55 | H  | 30.45515 | 45.76322 | 39.38293 | H  | 0 0 | 0.00000 |
| HETATM | 56 | H  | 30.22435 | 44.52312 | 41.55799 | H  | 0 0 | 0.00000 |
| HETATM | 57 | H  | 34.37166 | 37.27091 | 43.55109 | H  | 0 0 | 0.00000 |
| HETATM | 58 | H  | 33.00277 | 38.35705 | 44.02511 | H  | 0 0 | 0.00000 |
| HETATM | 59 | H  | 34.46612 | 39.07094 | 43.06954 | H  | 0 0 | 0.00000 |
| HETATM | 60 | H  | 33.01632 | 35.79630 | 42.44956 | H  | 0 0 | 0.00000 |
| HETATM | 61 | H  | 31.94468 | 36.20658 | 41.08295 | H  | 0 0 | 0.00000 |
| HETATM | 62 | H  | 31.50786 | 36.74715 | 42.70518 | H  | 0 0 | 0.00000 |
| HETATM | 63 | H  | 31.38070 | 38.89996 | 42.04214 | H  | 0 0 | 0.00000 |
| HETATM | 64 | H  | 31.82641 | 38.69097 | 40.26356 | H  | 0 0 | 0.00000 |
| HETATM | 65 | H  | 32.64922 | 39.94087 | 41.22815 | H  | 0 0 | 0.00000 |
| HETATM | 66 | H  | 30.16491 | 42.72149 | 43.16190 | H  | 0 0 | 0.00000 |
| HETATM | 67 | H  | 30.64290 | 44.17850 | 44.02821 | H  | 0 0 | 0.00000 |
| HETATM | 68 | H  | 31.08017 | 42.53082 | 44.72210 | H  | 0 0 | 0.00000 |
| HETATM | 69 | H  | 33.52372 | 43.60070 | 44.81158 | H  | 0 0 | 0.00000 |
| HETATM | 70 | H  | 32.81346 | 45.10811 | 44.08107 | H  | 0 0 | 0.00000 |
| HETATM | 71 | H  | 34.17995 | 44.28503 | 43.20107 | H  | 0 0 | 0.00000 |
| HETATM | 72 | H  | 32.24389 | 41.12362 | 42.07026 | H  | 0 0 | 0.00000 |
| HETATM | 73 | H  | 32.38785 | 41.10335 | 43.75555 | H  | 0 0 | 0.00000 |
| HETATM | 74 | H  | 33.87719 | 41.51528 | 42.79593 | H  | 0 0 | 0.00000 |
| HETATM | 75 | Ru | 41.23225 | 35.20264 | 39.41471 | Ru | 0 0 | 0.00000 |
| HETATM | 76 | O  | 42.31742 | 35.94615 | 40.70270 | O  | 0 0 | 0.00000 |
| HETATM | 77 | O  | 40.73003 | 33.70484 | 40.41417 | O  | 0 0 | 0.00000 |
| HETATM | 78 | N  | 39.76954 | 36.31685 | 40.62539 | N  | 0 0 | 0.00000 |
| HETATM | 79 | N  | 41.63866 | 36.98790 | 38.21382 | N  | 0 0 | 0.00000 |
| HETATM | 80 | N  | 39.41634 | 35.01803 | 38.18150 | N  | 0 0 | 0.00000 |
| HETATM | 81 | C  | 39.46571 | 38.37129 | 41.88565 | C  | 0 0 | 0.00000 |
| HETATM | 82 | C  | 40.21914 | 37.58747 | 41.04078 | C  | 0 0 | 0.00000 |
| HETATM | 83 | C  | 38.55016 | 35.88766 | 40.96071 | C  | 0 0 | 0.00000 |
| HETATM | 84 | C  | 37.69475 | 36.69122 | 41.73484 | C  | 0 0 | 0.00000 |
| HETATM | 85 | C  | 38.13406 | 37.96017 | 42.23092 | C  | 0 0 | 0.00000 |
| HETATM | 86 | C  | 40.54100 | 37.14326 | 37.34857 | C  | 0 0 | 0.00000 |
| HETATM | 87 | C  | 40.29384 | 38.36737 | 36.60094 | C  | 0 0 | 0.00000 |
| HETATM | 88 | C  | 39.34377 | 38.50732 | 35.54429 | C  | 0 0 | 0.00000 |
| HETATM | 89 | C  | 38.53028 | 37.36767 | 35.28270 | C  | 0 0 | 0.00000 |

|        |     |   |          |          |          |   |     |         |
|--------|-----|---|----------|----------|----------|---|-----|---------|
| HETATM | 90  | C | 38.58741 | 36.27191 | 36.18804 | C | 0 0 | 0.00000 |
| HETATM | 91  | C | 39.53568 | 36.06683 | 37.23626 | C | 0 0 | 0.00000 |
| HETATM | 92  | C | 42.67567 | 37.73759 | 38.39271 | C | 0 0 | 0.00000 |
| HETATM | 93  | C | 43.72108 | 37.40261 | 39.32983 | C | 0 0 | 0.00000 |
| HETATM | 94  | C | 43.53967 | 36.56117 | 40.51514 | C | 0 0 | 0.00000 |
| HETATM | 95  | C | 44.67321 | 36.25311 | 41.36857 | C | 0 0 | 0.00000 |
| HETATM | 96  | C | 45.85935 | 36.95436 | 41.05802 | C | 0 0 | 0.00000 |
| HETATM | 97  | C | 46.01407 | 37.85072 | 39.98959 | C | 0 0 | 0.00000 |
| HETATM | 98  | C | 45.00438 | 38.03901 | 39.03635 | C | 0 0 | 0.00000 |
| HETATM | 99  | C | 38.57116 | 34.05080 | 38.24998 | C | 0 0 | 0.00000 |
| HETATM | 100 | C | 38.63480 | 32.97012 | 39.21309 | C | 0 0 | 0.00000 |
| HETATM | 101 | C | 37.52551 | 32.04660 | 39.05627 | C | 0 0 | 0.00000 |
| HETATM | 102 | C | 37.42714 | 30.97651 | 39.95917 | C | 0 0 | 0.00000 |
| HETATM | 103 | C | 38.51749 | 30.73625 | 40.83602 | C | 0 0 | 0.00000 |
| HETATM | 104 | C | 39.61279 | 31.62510 | 40.97931 | C | 0 0 | 0.00000 |
| HETATM | 105 | C | 39.65417 | 32.86987 | 40.21270 | C | 0 0 | 0.00000 |
| HETATM | 106 | C | 44.52496 | 35.31099 | 42.49163 | C | 0 0 | 0.00000 |
| HETATM | 107 | C | 45.79293 | 35.17933 | 43.35423 | C | 0 0 | 0.00000 |
| HETATM | 108 | C | 44.20747 | 33.90746 | 41.95034 | C | 0 0 | 0.00000 |
| HETATM | 109 | C | 43.37843 | 35.69029 | 43.44574 | C | 0 0 | 0.00000 |
| HETATM | 110 | C | 40.67804 | 31.29390 | 41.93601 | C | 0 0 | 0.00000 |
| HETATM | 111 | C | 40.53927 | 29.98199 | 42.72506 | C | 0 0 | 0.00000 |
| HETATM | 112 | C | 40.86274 | 32.42639 | 42.96662 | C | 0 0 | 0.00000 |
| HETATM | 113 | C | 41.97900 | 31.08740 | 41.10868 | C | 0 0 | 0.00000 |
| HETATM | 114 | H | 41.22216 | 37.92545 | 40.61800 | H | 0 0 | 0.00000 |
| HETATM | 115 | H | 38.27976 | 34.90978 | 40.54239 | H | 0 0 | 0.00000 |
| HETATM | 116 | H | 36.73592 | 36.30799 | 42.09920 | H | 0 0 | 0.00000 |
| HETATM | 117 | H | 37.45741 | 38.65153 | 42.76711 | H | 0 0 | 0.00000 |
| HETATM | 118 | H | 40.89425 | 39.26609 | 36.80869 | H | 0 0 | 0.00000 |
| HETATM | 119 | H | 39.30666 | 39.44668 | 34.92992 | H | 0 0 | 0.00000 |
| HETATM | 120 | H | 37.88886 | 37.32875 | 34.38874 | H | 0 0 | 0.00000 |
| HETATM | 121 | H | 37.73980 | 35.55813 | 36.01784 | H | 0 0 | 0.00000 |
| HETATM | 122 | H | 42.78725 | 38.68387 | 37.79902 | H | 0 0 | 0.00000 |
| HETATM | 123 | H | 46.78120 | 36.87375 | 41.72991 | H | 0 0 | 0.00000 |
| HETATM | 124 | H | 46.97256 | 38.42919 | 39.83671 | H | 0 0 | 0.00000 |
| HETATM | 125 | H | 45.16721 | 38.63612 | 38.14013 | H | 0 0 | 0.00000 |
| HETATM | 126 | H | 37.71921 | 34.10454 | 37.54214 | H | 0 0 | 0.00000 |
| HETATM | 127 | H | 36.80798 | 32.28369 | 38.24790 | H | 0 0 | 0.00000 |
| HETATM | 128 | H | 36.53201 | 30.30299 | 39.88056 | H | 0 0 | 0.00000 |
| HETATM | 129 | H | 38.43786 | 29.74390 | 41.40146 | H | 0 0 | 0.00000 |
| HETATM | 130 | H | 46.62868 | 34.78622 | 42.73800 | H | 0 0 | 0.00000 |
| HETATM | 131 | H | 45.61025 | 34.56793 | 44.29404 | H | 0 0 | 0.00000 |
| HETATM | 132 | H | 46.11106 | 36.23883 | 43.67282 | H | 0 0 | 0.00000 |
| HETATM | 133 | H | 45.04393 | 33.40140 | 41.44349 | H | 0 0 | 0.00000 |
| HETATM | 134 | H | 43.35218 | 33.99236 | 41.20769 | H | 0 0 | 0.00000 |
| HETATM | 135 | H | 43.88512 | 33.29286 | 42.82899 | H | 0 0 | 0.00000 |
| HETATM | 136 | H | 43.17929 | 34.91906 | 44.18032 | H | 0 0 | 0.00000 |
| HETATM | 137 | H | 42.41404 | 35.89402 | 42.89211 | H | 0 0 | 0.00000 |
| HETATM | 138 | H | 43.65744 | 36.66981 | 43.96685 | H | 0 0 | 0.00000 |
| HETATM | 139 | H | 40.37070 | 29.04040 | 42.12171 | H | 0 0 | 0.00000 |

|        |     |    |          |          |          |    |     |         |
|--------|-----|----|----------|----------|----------|----|-----|---------|
| HETATM | 140 | H  | 39.65809 | 30.10823 | 43.45101 | H  | 0 0 | 0.00000 |
| HETATM | 141 | H  | 41.46110 | 29.88233 | 43.29689 | H  | 0 0 | 0.00000 |
| HETATM | 142 | H  | 41.67259 | 32.11813 | 43.67418 | H  | 0 0 | 0.00000 |
| HETATM | 143 | H  | 39.92150 | 32.60338 | 43.53269 | H  | 0 0 | 0.00000 |
| HETATM | 144 | H  | 41.20042 | 33.43496 | 42.55289 | H  | 0 0 | 0.00000 |
| HETATM | 145 | H  | 42.87133 | 31.20519 | 41.81386 | H  | 0 0 | 0.00000 |
| HETATM | 146 | H  | 42.06809 | 31.80984 | 40.26778 | H  | 0 0 | 0.00000 |
| HETATM | 147 | H  | 42.05393 | 30.09559 | 40.57543 | H  | 0 0 | 0.00000 |
| HETATM | 148 | Ru | 43.95709 | 43.25702 | 39.65478 | Ru | 0 0 | 0.00000 |
| HETATM | 149 | O  | 42.52532 | 44.05670 | 40.67592 | O  | 0 0 | 0.00000 |
| HETATM | 150 | O  | 45.23609 | 43.35640 | 40.96336 | O  | 0 0 | 0.00000 |
| HETATM | 151 | N  | 43.39682 | 41.56365 | 40.78318 | N  | 0 0 | 0.00000 |
| HETATM | 152 | N  | 42.50564 | 42.21390 | 38.24375 | N  | 0 0 | 0.00000 |
| HETATM | 153 | N  | 45.33246 | 41.91921 | 38.51852 | N  | 0 0 | 0.00000 |
| HETATM | 154 | C  | 41.79133 | 40.08297 | 41.79626 | C  | 0 0 | 0.00000 |
| HETATM | 155 | C  | 42.12801 | 41.24977 | 41.05147 | C  | 0 0 | 0.00000 |
| HETATM | 156 | C  | 44.42550 | 40.72874 | 41.16875 | C  | 0 0 | 0.00000 |
| HETATM | 157 | C  | 44.18591 | 39.60836 | 41.99153 | C  | 0 0 | 0.00000 |
| HETATM | 158 | C  | 42.83697 | 39.25040 | 42.29544 | C  | 0 0 | 0.00000 |
| HETATM | 159 | C  | 43.22958 | 41.31905 | 37.38517 | C  | 0 0 | 0.00000 |
| HETATM | 160 | C  | 42.60154 | 40.55786 | 36.33067 | C  | 0 0 | 0.00000 |
| HETATM | 161 | C  | 43.31061 | 39.65132 | 35.50512 | C  | 0 0 | 0.00000 |
| HETATM | 162 | C  | 44.72005 | 39.60441 | 35.57508 | C  | 0 0 | 0.00000 |
| HETATM | 163 | C  | 45.42188 | 40.30426 | 36.60246 | C  | 0 0 | 0.00000 |
| HETATM | 164 | C  | 44.68745 | 41.16038 | 37.52400 | C  | 0 0 | 0.00000 |
| HETATM | 165 | C  | 41.21735 | 42.52000 | 38.30246 | C  | 0 0 | 0.00000 |
| HETATM | 166 | C  | 40.65582 | 43.68147 | 38.94378 | C  | 0 0 | 0.00000 |
| HETATM | 167 | C  | 41.38042 | 44.42922 | 40.03358 | C  | 0 0 | 0.00000 |
| HETATM | 168 | C  | 40.75802 | 45.69105 | 40.43784 | C  | 0 0 | 0.00000 |
| HETATM | 169 | C  | 39.46321 | 45.97981 | 40.01926 | C  | 0 0 | 0.00000 |
| HETATM | 170 | C  | 38.74584 | 45.18110 | 39.10556 | C  | 0 0 | 0.00000 |
| HETATM | 171 | C  | 39.33188 | 44.03726 | 38.52241 | C  | 0 0 | 0.00000 |
| HETATM | 172 | C  | 46.63820 | 42.07580 | 38.72427 | C  | 0 0 | 0.00000 |
| HETATM | 173 | C  | 47.21008 | 43.08784 | 39.54216 | C  | 0 0 | 0.00000 |
| HETATM | 174 | C  | 48.63031 | 43.30499 | 39.34097 | C  | 0 0 | 0.00000 |
| HETATM | 175 | C  | 49.24479 | 44.32775 | 40.07764 | C  | 0 0 | 0.00000 |
| HETATM | 176 | C  | 48.47530 | 45.08829 | 41.03175 | C  | 0 0 | 0.00000 |
| HETATM | 177 | C  | 47.10450 | 44.93902 | 41.29521 | C  | 0 0 | 0.00000 |
| HETATM | 178 | C  | 46.49795 | 43.82698 | 40.60018 | C  | 0 0 | 0.00000 |
| HETATM | 179 | C  | 41.43112 | 46.70804 | 41.30627 | C  | 0 0 | 0.00000 |
| HETATM | 180 | C  | 41.69470 | 46.35717 | 42.77611 | C  | 0 0 | 0.00000 |
| HETATM | 181 | C  | 40.59070 | 48.01228 | 41.29238 | C  | 0 0 | 0.00000 |
| HETATM | 182 | C  | 42.80379 | 47.10851 | 40.71094 | C  | 0 0 | 0.00000 |
| HETATM | 183 | C  | 46.33534 | 45.87617 | 42.19920 | C  | 0 0 | 0.00000 |
| HETATM | 184 | C  | 47.19461 | 45.93972 | 43.47070 | C  | 0 0 | 0.00000 |
| HETATM | 185 | C  | 44.97659 | 45.33785 | 42.67722 | C  | 0 0 | 0.00000 |
| HETATM | 186 | C  | 46.13364 | 47.22293 | 41.49104 | C  | 0 0 | 0.00000 |
| HETATM | 187 | H  | 41.35141 | 41.89672 | 40.56832 | H  | 0 0 | 0.00000 |
| HETATM | 188 | H  | 45.49049 | 40.95561 | 40.88341 | H  | 0 0 | 0.00000 |
| HETATM | 189 | H  | 45.08851 | 38.95928 | 42.23966 | H  | 0 0 | 0.00000 |

|        |     |   |          |          |          |   |     |         |
|--------|-----|---|----------|----------|----------|---|-----|---------|
| HETATM | 190 | H | 42.63574 | 38.27310 | 42.79611 | H | 0 0 | 0.00000 |
| HETATM | 191 | H | 41.51898 | 40.61547 | 36.20300 | H | 0 0 | 0.00000 |
| HETATM | 192 | H | 42.83814 | 39.00976 | 34.70512 | H | 0 0 | 0.00000 |
| HETATM | 193 | H | 45.21970 | 38.90865 | 34.88605 | H | 0 0 | 0.00000 |
| HETATM | 194 | H | 46.53753 | 40.23961 | 36.68324 | H | 0 0 | 0.00000 |
| HETATM | 195 | H | 40.60152 | 42.10682 | 37.45117 | H | 0 0 | 0.00000 |
| HETATM | 196 | H | 38.97724 | 46.92579 | 40.38217 | H | 0 0 | 0.00000 |
| HETATM | 197 | H | 37.70011 | 45.35067 | 38.83295 | H | 0 0 | 0.00000 |
| HETATM | 198 | H | 38.83803 | 43.47855 | 37.75989 | H | 0 0 | 0.00000 |
| HETATM | 199 | H | 47.28591 | 41.43349 | 38.10566 | H | 0 0 | 0.00000 |
| HETATM | 200 | H | 49.20054 | 42.75000 | 38.56124 | H | 0 0 | 0.00000 |
| HETATM | 201 | H | 50.31680 | 44.47549 | 39.86085 | H | 0 0 | 0.00000 |
| HETATM | 202 | H | 48.99849 | 45.83921 | 41.61602 | H | 0 0 | 0.00000 |
| HETATM | 203 | H | 42.39110 | 47.11705 | 43.24137 | H | 0 0 | 0.00000 |
| HETATM | 204 | H | 42.22307 | 45.36314 | 42.90136 | H | 0 0 | 0.00000 |
| HETATM | 205 | H | 40.82374 | 46.34841 | 43.44226 | H | 0 0 | 0.00000 |
| HETATM | 206 | H | 39.49985 | 47.82623 | 41.46612 | H | 0 0 | 0.00000 |
| HETATM | 207 | H | 40.70077 | 48.63279 | 40.34855 | H | 0 0 | 0.00000 |
| HETATM | 208 | H | 40.92327 | 48.66934 | 42.12349 | H | 0 0 | 0.00000 |
| HETATM | 209 | H | 43.56040 | 47.28834 | 41.50432 | H | 0 0 | 0.00000 |
| HETATM | 210 | H | 42.68079 | 48.01882 | 40.11224 | H | 0 0 | 0.00000 |
| HETATM | 211 | H | 43.22162 | 46.31388 | 40.06044 | H | 0 0 | 0.00000 |
| HETATM | 212 | H | 48.00843 | 46.69351 | 43.42496 | H | 0 0 | 0.00000 |
| HETATM | 213 | H | 47.65211 | 44.93916 | 43.71306 | H | 0 0 | 0.00000 |
| HETATM | 214 | H | 46.57094 | 46.22600 | 44.35643 | H | 0 0 | 0.00000 |
| HETATM | 215 | H | 44.56161 | 45.81460 | 43.59216 | H | 0 0 | 0.00000 |
| HETATM | 216 | H | 45.10532 | 44.27718 | 43.01894 | H | 0 0 | 0.00000 |
| HETATM | 217 | H | 44.18039 | 45.31491 | 41.93788 | H | 0 0 | 0.00000 |
| HETATM | 218 | H | 47.12870 | 47.74646 | 41.28088 | H | 0 0 | 0.00000 |
| HETATM | 219 | H | 45.44496 | 47.90143 | 42.08272 | H | 0 0 | 0.00000 |
| HETATM | 220 | H | 45.66227 | 47.13978 | 40.51124 | H | 0 0 | 0.00000 |
| HETATM | 221 | C | 33.52777 | 40.95313 | 38.74486 | C | 0 0 | 0.00000 |
| HETATM | 222 | O | 32.63651 | 40.58195 | 38.09983 | O | 0 0 | 0.00000 |
| HETATM | 223 | C | 42.23872 | 34.07275 | 38.07000 | C | 0 0 | 0.00000 |
| HETATM | 224 | O | 42.83063 | 33.38197 | 37.36679 | O | 0 0 | 0.00000 |
| HETATM | 225 | C | 44.47317 | 44.76890 | 38.47164 | C | 0 0 | 0.00000 |
| HETATM | 226 | O | 44.72001 | 45.66699 | 37.79563 | O | 0 0 | 0.00000 |

Restraints for pyridine rotation of **3g**:

TORSION RESTRAINT 81 2 8 12 178.98 2500.00 0.5000 -0.001800

TORSION RESTRAINT 154 2 81 85 -178.15 2500.00 0.5000 0.001800
